1 **Bridging multilocus species delimitation and DNA barcoding through target enrichment of**  
2 **UCEs: a case study with Mexican highland frogs**

3

4 Eugenia Zarza<sup>1</sup>, Elizabeth M. Connors<sup>1</sup>, James M. Maley<sup>1</sup>, Whitney L.E. Tsai<sup>1</sup>, Peter Heimes<sup>2</sup>,  
5 Moises Kaplan<sup>3</sup> & John E. McCormack<sup>1,\*</sup>

6

7 <sup>1</sup> Moore Laboratory of Zoology, Occidental College, Los Angeles, CA 90041

8 <sup>2</sup> Playa Miramar 441, Colonia Marte 08830, Mexico City, Mexico

9 <sup>3</sup> 1508 Brooklyn Ave, Ann Arbor, Michigan 48104

10

11

12 \*Corresponding author: [mccormack@oxy.edu](mailto:mccormack@oxy.edu)

13

## 14 Abstract

15 Species delimitation has been divided by two approaches: DNA barcoding that focuses on  
16 standardization of the genetic marker and multilocus methods that place a premium on  
17 genomic coverage and conceptual rigor in modeling the divergence process. Most multilocus  
18 methods fail as barcodes, however, because few assay the same marker set and are therefore not  
19 readily comparable across studies and databases. We introduce ultraconserved elements (UCEs)  
20 as potential genomic barcodes that allow rigorous species delimitation and a bridge to DNA  
21 barcoding database to allow both rigorous species delimitation and standardized identification  
22 of delimited taxa. UCEs query thousands of loci across the nuclear genome in way that is  
23 replicable across broad taxonomic groups (i.e., vertebrates). We apply UCEs to species  
24 delimitation in a species complex of frogs found in the Mexican Highlands. *Sarcohyala* contains  
25 24 described species, many of which are critically endangered and known only from their type  
26 localities. Evidence suggests that one broadly distributed member of the genus, *S. bistincta*,  
27 might contain multiple species. We generated data from 1,891 UCEs, which contained 1,742  
28 informative SNPs for *S. bistincta* and closely related species. We also captured mitochondrial  
29 genomes for most samples as off-target bycatch of the UCE enrichment process. Phylogenies  
30 from UCEs and mtDNA agreed in many ways, but differed in that mtDNA suggested a more  
31 complex evolutionary history perhaps influenced by reticulate processes. The species  
32 delimitation method we used identified eight putative species (which we call lineages pending  
33 further study) within *S. bistincta*. Being able to compare linked mtDNA data to existing  
34 sequences on Genbank allowed us to identify one of these lineages nested within *S. bistincta* as  
35 an already-described species, *S. pentheter*. Another lineage nested within *S. bistincta* is currently  
36 being described as a new species (referred to here as *sp. nov.*). The remaining six lineages fell  
37 into two non-sister clades, one containing the core *S. bistincta* mostly in Oaxaca and Guerrero,  
38 and another in the Transvolcanic Belt. The latter clade, at 10% divergence in mtDNA and  
39 paraphyletic with respect to other *S. bistincta*, is a clear candidate for species status. Our study

40 demonstrates not only that UCEs can be used as effective genomic DNA barcodes, but that  
41 combining multilocus genomic data with mtDNA is a powerful approach for both delimiting  
42 species and identifying them in poorly described and phenotypically challenging groups.

43

44 Keywords: ultraconserved elements, genomics, population genetics, phylogeography,  
45 phylogenetics, systematics, species limits, Hyalinae

## 46 **Introduction**

47 Species are the fundamental biological unit and their identification and description is critical to  
48 ecology, evolution, and conservation (DeSalle and Amato 2004; Isaac et al. 2004; Mace 2004;  
49 Wiens 2007). Identifying species has always been a challenging issue in biology, especially  
50 when lineages are near the cusp of speciation (De Queiroz 2007). Yet, for the vast majority of  
51 researchers working on poorly described groups under conservation threat, conceptual debates  
52 over identifying the precise moment when one species becomes two have been superseded by  
53 the practical need for methods to quickly assess and identify the basic units of biodiversity (Hey  
54 et al. 2003; Tautz et al. 2003; Bickford et al. 2007). As a result, species delimitation methods have  
55 multiplied over the last ten years, especially those using DNA data (Pons et al. 2006; Knowles  
56 and Carstens 2007; O'Meara 2009; Yang and Rannala 2010; Fujita et al. 2012; Leaché et al. 2014).

57 While there are now a wide variety of methods that employ different DNA sources and  
58 algorithms to delimit species, these methods can be broadly placed into two frameworks. DNA  
59 barcoding focuses on species delimitation through the application of thresholds of sequence  
60 divergence, usually at a single mitochondrial DNA (Hebert et al. 2003) or chloroplast locus  
61 (Taberlet et al. 2007). DNA barcoding is relatively cheap and easy to implement, and by  
62 focusing on a single marker, a large database has been built by researchers, which allows for  
63 comparison of newly delimited species to already-identified species that have associated DNA.  
64 With its large user base, DNA barcoding has made substantial contributions to taxonomy and  
65 conservation of poorly known groups and geographic areas (Hebert et al. 2004; Ward et al. 2005;  
66 Witt et al. 2006; Lahaye et al. 2008). The very simplicity of DNA barcoding has made it  
67 controversial since its inception (Moritz and Cicero 2004; DeSalle et al. 2005; Ebach and  
68 Holdrege 2005; Will et al. 2005). Critics argue that it oversimplifies complex divergence  
69 processes with arbitrary thresholds that vary from one organismal group to another. Also, the  
70 history of a single gene will often fail to reflect the evolutionary history of populations and

71 species (Edwards and Bensch 2009; Galtier et al. 2009), thereby misleading delimitation efforts  
72 in some cases.

73 Multilocus species delimitation, on the other hand, addresses many of the perceived  
74 weaknesses of DNA barcoding by incorporating a process of gene inheritance (coalescence) and  
75 by using information from many genomic locations to more accurately reflect the history of  
76 lineages and how they diverged. Multilocus species delimitation, however, has been criticized  
77 on the practical grounds that large amounts of genomic data are usually not needed to delimit  
78 species, and the marginal gains more loci might afford are outstripped by the computational  
79 burden of modeling complex speciation processes with large data sets (Collins and Cruickshank  
80 2014). Another key criticism, which we focus on specifically, is that the lack of standardized  
81 multilocus marker sets inhibits the broad adoption of multilocus delimitation methods because  
82 newly delimited taxa cannot be readily compared to an existing database to determine if the  
83 putative new species have already been identified and named and, if not, how they relate to  
84 other species in an evolutionary context.

85 Our goal is to introduce ultraconserved elements (UCEs) as a candidate for a  
86 standardized genomic marker set for multilocus species delimitation and identification and to  
87 show how this kind of multilocus data can be even more powerful when linked to DNA  
88 barcoding-type data (i.e., mtDNA). UCEs are appealing as genomic barcodes because the same  
89 loci are found across major branches of the tree of life, where they act as anchors for variable  
90 DNA in flanking regions (Faircloth et al. 2012). For instance, it is possible to capture the same  
91 set of 1000 or more UCEs across all mammals (McCormack et al. 2012), all reptiles (Crawford et  
92 al. 2012), or hundreds of UCEs across arachnid lineages separated by hundreds of millions of  
93 years (Starrett et al. 2016). While the power of UCEs for deep-level systematics is clear, their  
94 utility at shallower scales around the species level has only recently been demonstrated (Smith  
95 et al. 2014; McCormack et al. 2016; Zarza et al. 2016). An added benefit of the UCE enrichment  
96 process (and all so-called “sequence capture” methods) is that whole mtDNA genomes are often

97 captured as off-target “bycatch” (do Amaral et al. 2015), allowing for each individual to have  
98 associated nuclear and mtDNA data (e.g., Zarza et al. 2016).

99 We apply UCEs as genomic barcodes to species delimitation in treefrogs in the genus  
100 *Sarcohyla* in the northern Mexican Highlands. This genus, which was recently split from  
101 *Plectrohyla* to reflect those species west of the Isthmus of Tehuantepec (Duellman et al. 2016),  
102 contains 24 described species, many of them critically endangered and many that have never  
103 been seen after their original discovery (references compiled in Stuart et al. 2008). Some species  
104 are thought to be in serious decline or extinct (Lips et al. 2004). Species limits and relationships  
105 within *Sarcohyla* are not well known because few species have associated DNA sequences, and  
106 the lack of voucher material means that the tadpole stages and geographic ranges for each  
107 species are not well characterized (Duellman 2001; Faivovich et al. 2009; Duellman et al. 2016).  
108 We focus specifically on the *Sarcohyla bistincta* complex and closely related species. *Sarcohyla*  
109 *bistincta* is one of the more broadly distributed members of the genus and might comprise  
110 multiple species. Especially in its early developmental stages, *S. bistincta* looks similar to closely  
111 related species, meaning that identification from tadpoles can be challenging. Thus, *Sarcohyla*  
112 frogs present a good test case of whether UCE data are effective at delimiting species, and how  
113 linking UCE and mtDNA data is a powerful approach for helping identify delimited taxa by  
114 comparison to existing genetic databases.

## 115 **Methods**

### 116 *Sampling and Ingroup Determination*

117 MK collected tadpoles from January to June 2004 across most of the range where *Sarcohyla*  
118 *bistincta* are known to exist (Duellman 2001) in the Transvolcanic Belt of Michoacán, Morelos,  
119 and the state of México, the Sierra Madre del Sur of Guerrero, and the highlands of Oaxaca  
120 stretching into Puebla and Veracruz (Fig. 1; Table 1). Unsampled parts of the *S. bistincta* range  
121 include the far west Transvolcanic Belt in Michoacán and Jalisco, the far northwest in the Sierra

122 Madre Occidental (Nayarit, Durango, and Sinaloa), and the far northeast in Hidalgo (see Fig. S1  
123 for sampled and unsampled locations and known ranges of all *Sarcohyala* species). Tadpoles  
124 were targeted to improve sampling efficiency. After collection of many tadpoles from a  
125 sampling location with a dip net, they were separated by species based on morphology to the  
126 extent possible and reared to subadults in the laboratory prior to vouchering. Species  
127 identification was based on the most recent diagnosis of *S. bistincta* and other closely related  
128 species (Duellman 2001). One tadpole was chosen for the tissue voucher, while the other  
129 individuals became physical vouchers with museum catalog numbers. Thus, we provide both  
130 field numbers and catalog numbers in Table 1 to provide a link to both the exact genetic  
131 material and the associated voucher for that genotype. Before limiting our taxonomic sampling  
132 to 38 *S. bistincta* samples and two close outgroups, we ran preliminary phylogenetic analyses  
133 also including samples from 45 *Sarcohyala* individuals and the outgroup genus *Exerodonta* to  
134 ensure we had correctly identified the ingroup and closest outgroups (Table S1).

### 135 *Sequence capture and next-generation sequencing*

136 We extracted genomic DNA from tissue using a Qiagen (Valencia, CA) DNAeasy Blood and  
137 Tissue extraction kit. We visualized extractions on an agarose gel to ensure fragments were  
138 larger than 200 base pairs (bp) and quantified the resulting double-stranded DNA using a Qubit  
139 2.0 Fluorometer (Carlsbad, CA). For each sample, we sheared 100  $\mu$ l of 20ng/ $\mu$ l concentration  
140 DNA to a size distribution with its peak between 400 and 600 bp using a Bioruptor  
141 ultrasonicator (Diagenode). We prepared libraries for each sheared sample with a KAPA  
142 (Boston, MA) LTP library preparation kit for the Illumina platform, attaching custom indexing  
143 tags (Faircloth and Glenn 2012) to each sample to allow sample pooling.

144 We enriched pools of eight samples using a set of synthetic RNA probes that target 5,060  
145 tetrapod UCEs (MYbaits\_Tetrapods-UCE-5K kit, Mycarray) following the standard UCE  
146 enrichment protocol (Faircloth et al. 2012) with one modification. Amphibians have large and  
147 variable genome sizes with a high percentage of repetitive DNA (Olmo 1991). While we do not

148 have information about the genome size and composition of *Sarcohylla* specifically, we wanted to  
149 decrease the potential risk of the probes hybridizing to repetitive elements (McCartney-Melstad  
150 et al. 2016). We thus increased by 6X the amount of the Cot-1 blocker, a synthetic DNA derived  
151 from chicken that binds to repetitive regions. After enrichment and recovery PCR, we verified  
152 the library size range with an Agilent 2100 Bioanalyzer (Palo Alto, CA). We quantified the  
153 enriched pools using qPCR and combined them in equimolar ratios before sequencing on an  
154 Illumina HiSeq 2000 lane (100-bp paired-end cycle) at the University of California Santa Cruz  
155 Genome Technology Center.

#### 156 *Bioinformatics of next-generation sequencing data*

157 We demultiplexed the Illumina raw reads and converted them to FASTQ format with the  
158 program bcl2fastq v.1.8.4 (Illumina, Inc.). We created quality control reports with FASTQC  
159 v0.10.1 to detect overrepresented sequences and adapter contamination. To eliminate adapter  
160 contamination and low quality bases, we trimmed the FASTQC output using illumiprocessor  
161 (Faircloth 2012). We trimmed and assembled these reads into contigs with Trinity (Haas et al.  
162 2013) and ABySS (Simpson et al. 2009), both of which are built into the PHYLUCE pipeline  
163 (Faircloth 2015). PHYLUCE uses LASTZ (Harris 2007) to align all assembled contigs to UCE  
164 probe sequences in order to isolate only UCE contigs and to identify and eliminate any paralogs  
165 (MATCH\_CONTIGS\_TO\_PROBES script). We then turned this filtered set of UCE contigs into a  
166 data matrix describing which UCE loci are present in which samples (GET\_MATCH\_COUNTS  
167 script).

#### 168 *Phylogenetic trees from concatenated UCE data*

169 We extracted contigs into a single FASTA file (GET\_FASTAS\_FROM\_MATCH\_COUNTS script)  
170 and aligned the output for each locus (SEQCAP\_ALIGN script) using MAFFT (Katoh et al.  
171 2005). We then required that 75% of the samples needed to have data for a given locus to be  
172 included in the final concatenated matrix (GET\_LOCI\_WITH\_MIN\_TAXA script). We



173 converted the NEXUS file into PHYLIP format (FORMAT\_NEXUS\_FILES\_FOR\_RAxML script)  
174 and constructed a maximum-likelihood (ML) tree in RAxML v8.0.19 (Stamatakis 2014) under  
175 the GTRGAMMA model of evolution with 100 bootstrap searches, followed by a search for the  
176 tree with the highest likelihood.

#### 177 *Mitochondrial DNA assembly and analysis*

178 We identified and assembled mtDNA genomes from off-target, trimmed Illumina reads using  
179 the reference genome of a closely related species, *Hyla annectans* (Genbank accession number  
180 KM271781; Ye et al. 2016). We used MITObim 1.7 (Hahn et al. 2013), a Perl wrapper for MIRA  
181 4.0.2 (Chevreux et al. 1999), that takes a baiting and iterative mapping approach for assembly.  
182 We conducted *de novo* annotation of the assembled mtDNA regions with the MITOchondrial  
183 genome annotation Server, MITOS (Bernt et al. 2013). We selected for phylogenetic analysis  
184 only those individual genomes with MIRA quality score greater than 30. We aligned each  
185 protein-coding region separately in Geneious vR8 (Kearse et al. 2012) using the integrated  
186 MUSCLE (Edgar 2004) plugin. We corrected the alignments manually when necessary and  
187 constructed a concatenated mtDNA matrix, which we also ran in RAxML v8.0.19.

188 Additionally, we melded our mtDNA data with existing *Sarcohyla* and *Plectrohyla*  
189 mtDNA data on Genbank to determine whether any of the lineages we uncovered in *S. bistrincta*  
190 relate to already-described species. We determined that *cytochrome b* is the best-represented on  
191 Genbank in this group. We downloaded all existing *cytochrome b* sequences from *Sarcohyla* and  
192 *Plectrohyla* taxa. We combined these sequences with those from a subset of our *S. bistrincta*  
193 samples, choosing the individual with the most raw reads from each major genetic lineage in  
194 the UCE tree. We used *Exerodonta* as an outgroup. Here, we aligned the trimmed, filtered reads  
195 for each individual to a *Sarcohyla cytochrome b* reference sequence. We formed a consensus  
196 sequence for each individual from the mapped reads. We then created an alignment and  
197 generated a phylogeny using BEAST v2.4.2 (Bouckaert et al. 2014). Because we were particularly

198 interested in how *S. pentheter* related to our lineages, but there are no *cytochrome b* sequences for  
199 *S. pentheter* on Genbank, we also compared our samples to Genbank samples using the *16S*  
200 gene.

#### 201 *Calling SNPs from UCE loci*

202 We called SNPs from UCE loci so that we could run genetic clustering tests and infer a species  
203 tree. Calling SNPs requires a reference sequence, and we chose the sample with the most UCE  
204 contigs recovered within the ingroup (UMMZ 239727). We then used BWA (Li and Durbin  
205 2009) to map the reads of each sample to this reference. We used SAMtools (Li et al. 2009) to  
206 sort the reads, and Picard (available at <http://broadinstitute.github.io/picard>) to identify and  
207 remove PCR duplicates. We realigned the mapped reads to minimize mismatched bases due to  
208 indels, and we removed indels using the Genome Analysis Toolkit 3.2 (GATK; McKenna et al.  
209 2010) and a custom script (*indelrealigner.sh*), as suggested by the Best Practices workflow  
210 (DePristo et al. 2011; van der Auwera et al. 2013).

211 There is no SNP database available for treefrogs, so we followed best practices for base  
212 recalibration for non-model organisms suggested by GATK (McKenna et al. 2010). This consists  
213 of (1) doing an initial round of calling SNPs on the original, uncalibrated data, (2) selecting the  
214 SNPs with the highest confidence (a minimum emission and call quality of 40 or more), and (3)  
215 using these SNPs as the database of known SNPs. We executed four rounds of base  
216 recalibration on the original data to filter out systematic error using a custom script (*genotype-*  
217 *recal.sh*). We called genotypes on the last recalibrated BAM file. We used *vcf-tools* (Danecek et  
218 al. 2011) to select one SNP per UCE and produce two data sets, one allowing 25% missing data  
219 for STRUCTURE v 2.3.4 (Pritchard et al. 2000), and one with no missing data, which is a  
220 requirement for SNAPP (Bryant et al. 2012) species tree analysis, implemented in BEAST v2.2.1  
221 (Bouckaert et al. 2014).

#### 222 *STRUCTURE analyses*

223 The species delimitation method we used requires some *a priori* information about possible  
224 clustering of individuals into species. We used STRUCTURE v2.3.4 as an unbiased way to  
225 assess the limits of fine-scale genetic structure in our data. Thus, our intent was not to  
226 determine the single most likely number of genetic clusters. Rather, our goal was to determine  
227 the maximum number of genetic clusters in our data. We began by analyzing all individuals of  
228 *S. bistincta* plus two outgroup species *S. chryses* and *S. hazelae* under  $K=4$ , reasoning that this  
229 would likely split out the two outgroups as well as revealing one division within the ingroup.  
230 After this, each identified genetic cluster was further analyzed at  $K=2$  until no further structure  
231 was evident.

### 232 *SNAPP tree and species delimitation*

233 We generated a species tree from the SNP matrix using SNAPP 1.1.10 (Bryant et al. 2012). This  
234 analysis included all putative *S. bistincta* samples and one outgroup, *S. chryses*. For this run, we  
235 made no *a priori* assumptions about how individuals grouped into species and allowed each  
236 individual to be considered its own “species” (i.e., terminal tip). We ran two instances of  
237 SNAPP for seven million generations using default priors. We combined tree and parameter  
238 files from both runs with LogCombiner 2.1.3 and displayed the full set of likely species trees  
239 with Densitree v2.2.1 (Bouckaert et al. 2014).

240 We then applied Bayes Factor Species Delimitation (BFD; Grummer et al. 2014; Leaché et  
241 al. 2014) to SNAPP analyses to determine the most likely number of species. We used the  
242 Structure results to generate hypotheses for how individuals might cluster into species. We  
243 tested five scenarios with BFD that split or lumped populations identified in the Structure  
244 analysis, including the hypothesis that all putative *S. bistincta* group into a single species. We  
245 assessed which scenario (2, 6, 7, 9, or 10 species) was favored by comparing Bayes factors using  
246 marginal likelihoods from the SNAPP analysis.

## 247 **Results**

### 248 *NGS summary statistics*

249 Detailed summary statistics for each of the 38 ingroup samples and two outgroups are  
250 described in Table 1. ABySS produced longer contigs than Trinity, and a higher number of UCE  
251 loci, so we used ABySS contigs in all downstream analyses. Reads per sample ranged from  
252 17,052 to 3,423,330 with an average of 1,185,165 reads. The number of identified UCEs ranged  
253 from 381 to 2,444 with an average of 1,976 UCEs. The mean length of individual UCE loci per  
254 individual ranged from 222 to 717 bp with an average of 522 bp. On average, 18% of the  
255 assembled contigs corresponded to unique UCE loci.

256 For SNP calling, across 40 samples of *S. bistincta* and outgroups, 9% of the trimmed  
257 reads mapped to our designated reference individual. The SNP read depth ranged from 2.4 to  
258 35.0 with an average depth of 21.2. The recalibration and quality control steps resulted in an  
259 initial matrix of 16,578 SNPs. After removing non-biallelic loci, selecting one SNP for every  
260 UCE, and allowing 25% missing data, there were 1,742 SNPs in the STRUCTURE data set, while  
261 the 100% complete data matrix for SNAPP contained 399 SNPs.

### 262 *UCE phylogeny from concatenated data*

263 Our more taxonomically inclusive data set with all available *Sarcohyala* and outgroup *Exerodonta*  
264 *xera* (Table S1) contained 1,866 UCE loci and 1,030,450 bp for a concatenated analysis. The  
265 resulting ML tree (Fig. S2) showed strong support for monophyly of *Sarcohyala*, and identified *S.*  
266 *arborescandens* and *S. cyclada* as sister species that together form a clade sister to the rest of the  
267 *Sarcohyala* included in the study. We thus limited further analyses to a smaller data set of 40  
268 samples with *S. hazelae* as the outgroup (Table 1). This focal data set contained 1,891 UCE loci  
269 and 1,038,600 bp. The ML tree of these 40 samples found strong support for many clades within  
270 the species currently described as *S. bistincta*, conforming to distinct geographic areas (Fig. 2a).  
271 In brief, there were three clades on relatively long branches: one distributed across the

272 Transvolcanic Belt (blue clade); one inhabiting two disjunct areas along the coastal slopes of the  
273 Sierra Madre del Sur in Guerrero and Oaxaca (gray clade); and one broadly distributed in the  
274 Sierra Madre del Sur (red and pink clades), the Oaxaca Highlands (yellow + orange clade), and  
275 one individual in the southern portion of the Transvolcanic Belt (purple). One individual that  
276 nested within *S. bistincta* was labeled as a different species, *S. mykter*, from Guerrero. We  
277 suspect that this sample was mislabeled and is actually a duplicate of an *S. bistincta* sample  
278 already included in the study because their field numbers are similar (last two digits  
279 transposed) and the two samples grouped together in all analyses. We have left this sample in  
280 all analyses, but labeled it as a duplicate of *S. bistincta* UMMZ 239749.

#### 281 *mtDNA tree*

282 Our final concatenated mtDNA matrix was 11,269 base pairs including gaps, as coverage of the  
283 mtDNA genome varied from sample to sample in accordance with the non-targeted nature of  
284 the DNA collection (Table 1). Relationships in the ML tree (Fig. 2b) among the 29 individuals  
285 with high quality scores were similar to the concatenated UCE tree with two key differences  
286 within the broadly distributed clade in Guerrero and Oaxaca: (1) in the mtDNA tree,  
287 individuals from Eastern and Western Guerrero (pink and red) formed a clade, whereas they  
288 were more divergent in the UCE tree; (2) in the mtDNA tree, individual UMMZ 239731 (purple)  
289 was still on a relatively long branch, but that branch was nested within the Guerrero clade  
290 described above instead of being sister to a much more expansive clade, as in the UCE tree.

#### 291 *Structure analysis*

292 The first run of STRUCTURE at K=4 split the two outgroup species into distinct clusters and  
293 split the remaining individuals into two clusters. Further analysis of each cluster at K=2  
294 revealed nine genetic clusters (Fig. 1b), which are concordant with clades observed in the UCE  
295 and mtDNA phylogeny, as well as with the delimited species (lineages) described below.

#### 296 *SNAPP species tree and species delimitation*

297 The cloudogram of posterior species trees obtained with SNAPP (Fig. 3) is consistent with the  
298 genetic clusters in the Structure analysis and with relationships in phylogenies resulting from  
299 the UCE and mtDNA concatenated analyses. With respect to the discrepancies between the two,  
300 the SNAPP tree agreed with the mtDNA tree that eastern and western Guerrero individuals  
301 form a clade, but agreed with UCE tree in the placement of individual UMMZ 239731. Bayes  
302 factor analysis of SNAPP runs with varying number of species suggested the best model  
303 consists of nine species. The model with nine species was supported by a factor of 10 over other  
304 models with more and fewer species (Table 2). These putative species are labeled as lineages in  
305 Fig. 3 and elsewhere, pending further study.

#### 306 *mtDNA phylogeny combining new data with Genbank sequences*

307 Using 16S sequences, we determined that our delimited Lineage 8 matched an *S. pentheter*  
308 sequence on Genbank. Lineage 8 individual UMMZ 239772 had one of the lowest read counts of  
309 any samples and very few mtDNA reads. However, five reads mapped to 16S covering 421 bp  
310 of the 681 bp reference sequence (Genbank *S. pentheter* accession number DQ055825). Over this  
311 stretch, UMMZ 239772 was identical to the reference. As a point of comparison, UMMZ 239679  
312 (a member of the blue *S. bistincta* Lineage 1 in the Transvolcanic Belt) had 70 differences across  
313 the 681 bp (10.3% divergence). This DNA identification of UMMZ 239772 as *S. pentheter* was  
314 confirmed by re-examining the subadult specimen.

315 After confirming UMMZ 239679 as *S. pentheter*, we generated a Bayesian tree of  
316 *cytochrome b* combining our samples with Genbank sequences (Fig. 4). This tree revealed not  
317 only that Lineage 8 (*S. pentheter*) was nested within the current *S. bistincta*, but so was another  
318 species not included in our sampling, *S. calthula*. Relationships within *S. bistincta* were  
319 otherwise similar to the more taxonomically inclusive mtDNA phylogeny. For example UMMZ  
320 239731 (purple) was still nested within the Guerrero samples (red and pink). The combined  
321 phylogeny also helped clarify relationships outside of *S. bistincta* by supporting *S. chryses* + *S.*  
322 *mykter* to be sister to the *S. bistincta* + *S. pentheter* + *S. calthula* complex.

## 323 Discussion

324 One limitation of current multilocus species delimitation methods is the lack of a standardized  
325 marker set that would allow for data from delimited species to be combined with already-  
326 existing data both to identify species and place them into broader evolutionary context (Collins  
327 and Cruickshank 2014; Coissac et al. 2016). Here, we show that UCEs not only are a good  
328 candidate for this standardized “genomic barcode” for multilocus species delimitation, but also  
329 that they are especially powerful when they can be linked to mtDNA data, which provides a  
330 bridge to well-developed mtDNA databases for species identification. Having linked mtDNA  
331 data allowed us to query our lineages, delimited with multilocus genomic data, against  
332 GenBank to see if any of them corresponded to already-described species and to place them in  
333 as broad a phylogenetic context as possible. Doing so revealed that *S. bistrincta* is paraphyletic,  
334 with two already-described species and one species in the process of description nested within  
335 its current species limits (Fig. 4). Our approach of delimiting species with multilocus data and  
336 identifying them with the help of mtDNA data will be especially powerful in groups where  
337 geographic ranges and subadult phenotypes are not well described or where species are  
338 phenotypically cryptic.

339 It was not our intention with this study to compare species delimitation methods, as this  
340 has been examined elsewhere (Camargo et al. 2012; Carstens et al. 2013; Miralles and Vences  
341 2013). We employed one, rather new delimitation method (Leaché et al. 2014), but there are  
342 others that would surely suggest somewhat higher or lower numbers of delimited species. We  
343 are not advocating that species be delimited and described solely based on DNA. There are  
344 cases where both DNA barcoding and multilocus species delimitation will under-split species  
345 (Hime et al. 2016) and cases where coalescent methods will confound population structure with  
346 speciation, thereby recommending over-splitting species (Sukumaran and Knowles 2017). We  
347 discuss the results of our delimitation analysis below, but by calling the putative species  
348 “lineages” we acknowledge that new species descriptions should await integrative taxonomy



349 including, at minimum, careful study of phenotypic differences in museum specimens. Finally,  
350 although we discuss discrepancies between the mtDNA and nuclear DNA phylogenies below,  
351 we did not set out explicitly to compare multilocus species delimitation to DNA barcoding. As  
352 mentioned, we feel our results demonstrate how mtDNA and nuclear data are most powerful  
353 when used together. Despite a few notable differences, discussed below, our UCE and mtDNA  
354 phylogenies are broadly congruent, suggesting that, if we carried out such a comparison, our  
355 results would be in line with prior work showing that multilocus species delimitation and DNA  
356 barcoding produce similar results (Collins and Cruickshank 2014; Downton et al. 2014).

357         Rather, in addition to showing the power of linking nuclear genomic data with mtDNA  
358 data, another goal of our study was to demonstrate that UCEs adhere to the concept of a  
359 “extended genomic barcode” (sensu Coissac et al. 2016) and produce data sets with enough  
360 resolving power for the necessarily recent divergences involved in species delimitation.  
361 Another recent study applied UCEs to species delimitation in two other frog genera,  
362 *Melanophryniscus* and *Brachycephalus* (Pie et al. 2017). This study used a more restrictive cut-off  
363 for including loci and produced 800 loci (in a 100% complete data matrix) with sufficient  
364 resolving power for species delimitation, compared to the roughly 1,900 loci (in a 75% complete  
365 data matrix) in our study. UCE probe sets are now available for many taxonomic groups  
366 (Faircloth et al. 2013; Faircloth et al. 2015; Starrett et al. 2016). They capture a discrete and  
367 replicable portion of the genome, in this case a set of around 2,000 loci in frogs (from a larger set  
368 of ~5,000 vertebrate loci) that query approximately 1,000,000 base pairs, or 0.02% of the frog  
369 genome. The replicable nature of UCEs sets them apart from other types of genomic markers,  
370 like RAD loci, which can vary from experiment to experiment (DaCosta and Sorenson 2014) and  
371 find fewer orthologs with increasing phylogenetic distance (Cruaud et al. 2014).

372         Bayes factor species delimitation identified nine lineages within the current *S. bistrincta*  
373 and a close outgroup, *S. chryses*. Apart from *S. chryses*, which was correctly delimited, the other  
374 eight lineages fell into three clades (Fig. 3). One lineage turned out to be the already-described



375 *S. pentheter* of Oaxaca, which we discovered by querying its 16S mtDNA data against existing  
376 Genbank sequences and reexamining the subadult specimen. Thus, both *S. pentheter* and *S.*  
377 *calthula* are nested within the currently-described *S. bistincta*. Below, we describe the three  
378 clades containing the eight lineages. Where warranted, formal species descriptions will follow  
379 in later publications.

380 **Clade 1** – Members of this clade are found in the Transvolcanic Belt of central Mexico. They are  
381 sister to the rest of the current *S. bistincta* + *S. pentheter* + *S. calthula*. This clade is a  
382 clear candidate for species recognition and might itself contain multiple species, as  
383 delimited below. Based on geography, unsampled populations of *S. bistincta* in the  
384 Sierra Madre Occidental (Fig. S1) are most likely related to this clade, but should be  
385 included in future studies, as they might comprise their own lineage.

386 Lineage 1 (light blue in Fig. 1) – Michoacán to western Mexico state. There is fine-scale  
387 genetic structure across this range, and the presence of a geographic and genetic  
388 intermediate hints at continuity of gene flow along the distribution from sites 1 to 4  
389 in Figure 1. Some populations in far western Michoacán (Fig. S1) are as yet  
390 unsampled and could reveal further genetic structure.

391 Lineage 2 (dark blue in Fig. 1) – Morelos. Further sampling between sites 4 and 5 could  
392 help determine whether the genetic distinctness of this individual is a true genetic  
393 discontinuity or the result of a sampling gap.

394 **Clade 2** – Members of this clade form the core *S. bistincta* and occur from Guerrero to Puebla  
395 and Veracruz and south through Oaxaca.

396 Lineage 3 (red in Fig. 1) – Central and eastern Guerrero. Members of this lineage are  
397 distinct from the pink lineage below and are monophyletic in the UCE trees (though  
398 not in the mtDNA tree). Further sampling in between site 6 and site 7 would clarify

399 whether the genetic discontinuity between Lineages 3 and 4 results from a sampling  
400 gap.

401 Lineage 4 (pink in Fig. 1) – Western Guerrero. This lineage is distinct and monophyletic  
402 in all trees, although only a few individuals were sampled only from one locality.

403 Lineage 5 (orange and yellow in Fig. 1) – Puebla, Veracruz, and Oaxaca. The geographic  
404 range of this group contains the type locality for *S. bistincta*. Central and southern  
405 Oaxaca individuals (orange) are genetically distinct from individuals to the north  
406 (yellow). One genetic intermediate in central Oaxaca suggests genetic continuity  
407 across this range. One individual from southern Oaxaca (site 25 in Fig. 1) has an  
408 unexpectedly northern genetic profile given its geographic location, suggesting a  
409 more complex geographic structuring within this group than a simple cline from  
410 north to south. An unsampled northern population of *S. bistincta* in Hidalgo is most  
411 likely related to this lineage, and should be included in future studies.

412 Lineage 6 (purple in Fig. 1) – far northern Guerrero. Represented by a single individual,  
413 this lineage is distinct and on a relatively long branch. However, in the mtDNA  
414 tree, this individual is nested within Lineages 4 and 5 above. Sampling more  
415 individuals is needed to determine how distinct this lineage might be.

416 **Clade 3** – Pacific slope of Guerrero and Oaxaca. Sister to Clade 2, members of this clade  
417 comprise two species, one already described and one currently being described.

418 Lineage 7 (dark gray in Fig. 1) – Pacific slope of Guerrero. This lineage was being  
419 described as a new species (we call it *sp. nov.*) on the basis of phenotypic differences  
420 before this genetic study was begun. Thus, our analysis lends support to species  
421 status for this lineage.

422 Lineage 8 (light gray in Fig. 1) – Pacific slope of Oaxaca. Genbank 16S mtDNA data and  
423 the phenotype of the voucher reveal this lineage to be the already-described species,  
424 *S. pentheter*, of southern and central Oaxaca.

425 The three clades and nearly all of the lineages were distinct in the mtDNA tree as well as  
426 the UCE tree (Fig. 2). The mtDNA tree, however, supports a more complicated history for  
427 Lineages 3, 4, and 6 in Clade 1 from Guerrero. It is unclear why UCE and mtDNA results  
428 differed in this regard, but some reticulate processes might have influenced the mtDNA  
429 genomes of these lineages, perhaps, given their close geographic proximity, mtDNA capture of  
430 one lineage by another through ancient hybridization (e.g., Bryson Jr et al. 2010).

431 The phylogeny combining our mtDNA data with Genbank data (Fig. 4) is the most  
432 taxonomically complete phylogeny of *Sarcohylla* and its sister genus *Plectrohyla* to date and  
433 demonstrates the power of linking multilocus species delimitation with mtDNA data by  
434 allowing delimited taxa to be placed in a broader context. This revealed that two already-  
435 described species are nested within the current *S. bistrincta*, lending support to species status of  
436 the divergent Clade 1 from the Transvolcanic Belt (which was ~10% divergent in mtDNA from  
437 *S. pentheter*). Additional insights afforded by the combined data mtDNA tree include support  
438 for a previously hypothesized close relationship between *S. hazelae* and *S. thorectes* (Faivovich et  
439 al. 2009), and a sister relationship between *S. mykter* and *S. chryses*. As the genus *Sarcohylla* is  
440 very poorly represented by voucher specimens and DNA sequences (Fig. S1), a complete  
441 understanding of the history of this genus must await more complete taxonomic and genomic  
442 sampling. Unfortunately, there appear to be some microendemic *Sarcohylla* that might have  
443 already gone extinct (Lips et al. 2004), especially in the Oaxacan highlands, although recent  
444 resurveys give some cause for hope of rediscoveries (Delia et al. 2013).

445 By introducing UCEs as extended DNA barcodes, we are not advocating abandoning  
446 traditional mtDNA barcoding and moving solely toward multilocus species delimitation. Even

447 though next-generation sequencing techniques are becoming more standardized and  
448 widespread, they still pose a significant financial barrier and require more technical expertise  
449 and equipment compared to mtDNA sequencing. However, there is no reason that nuclear  
450 genomic DNA barcodes like UCEs cannot develop their own user community and databases in  
451 parallel with mtDNA barcoding. As our study shows, mtDNA barcoding and multilocus  
452 species delimitation are powerful when deployed together. Where they agree in this study is  
453 that there is significant frog diversity in the Mexican Highlands that is currently unrecognized.  
454 To the extent that these distinct lineages can be rigorously delimited and compared against  
455 existing species, they can be added to biodiversity lists, allowing for their recognition and  
456 protection.

#### 457 **Acknowledgments**

458 We thank Greg Schneider and Ron Nussbaum at UMMZ for providing access to tissue samples  
459 and specimens and Oscar Flores for help with permits. The project was funded by National  
460 Science Foundation grant DEB-1258205 to JM.

#### 461 **Literature Cited**

- 462 Bernt M, Donath A, Jühling F, Externbrink F, Florentz C, Fritsch G, Pütz J, Middendorf M,  
463 Stadler PF (2013) MITOS: Improved de novo metazoan mitochondrial genome  
464 annotation. *Molecular Phylogenetics and Evolution*, **69**, 313-319.
- 465 Bickford D, Lohman DJ, Sodhi NS, Ng PK, Meier R, Winker K, Ingram KK, Das I (2007) Cryptic  
466 species as a window on diversity and conservation. *Trends in Ecology & Evolution*, **22**,  
467 148-155.
- 468 Bouckaert R, Heled J, Kühnert D, Vaughan T, Wu C-H, Xie D, Suchard MA, Rambaut A,  
469 Drummond AJ (2014) BEAST 2: a software platform for Bayesian evolutionary analysis.  
470 *PLoS Computational Biology*, **10**, e1003537.
- 471 Bryant D, Bouckaert R, Felsenstein J, Rosenberg NA, RoyChoudhury A (2012) Inferring species  
472 trees directly from biallelic genetic markers: bypassing gene trees in a full coalescent  
473 analysis. *Molecular Biology and Evolution*, **29**, 1917-1932.

- 474 Bryson Jr RW, De Oca ANM, Jaeger JR, Riddle BR (2010) Elucidation of cryptic diversity in a  
475 widespread Nearctic treefrog reveals episodes of mitochondrial gene capture as frogs  
476 diversified across a dynamic landscape. *Evolution*, **64**, 2315-2330.
- 477 Camargo A, Morando M, Avila LJ, Sites JW (2012) Species delimitation with ABC and other  
478 coalescent-based methods: a test of accuracy with simulations and an empirical example  
479 with lizards of the *Liolaemus darwini* complex (Squamata: Liolaemidae). *Evolution*, **66**,  
480 2834-2849.
- 481 Carstens BC, Pelletier TA, Reid NM, Satler JD (2013) How to fail at species delimitation.  
482 *Molecular Ecology*, **22**, 4369-4383.
- 483 Chevreur B, Wetter T, Suhai S (1999) Genome sequence assembly using trace signals and  
484 additional sequence information. *Computer Science and Biology: Proceedings of the German  
485 Conference on Bioinformatics*, **99**, 45-56.
- 486 Coissac E, Hollingsworth PM, Lavergne S, Taberlet P (2016) From barcodes to genomes:  
487 extending the concept of DNA barcoding. *Molecular Ecology*, **25**, 1423-1428.
- 488 Collins RA, Cruickshank RH (2014) Known knowns, known unknowns, unknown unknowns  
489 and unknown knowns in DNA barcoding: a comment on Downton et al. *Systematic  
490 Biology*, **63**, 1005-1009.
- 491 Crawford NG, Faircloth BC, McCormack JE, Brumfield RT, Winker K, Glenn TC (2012) More  
492 than 1000 ultraconserved elements provide evidence that turtles are the sister group of  
493 archosaurs. *Biology Letters*, **8**, 783-786.
- 494 Cruaud A, Gautier M, Galan M, Foucaud J, Sauné L, Genson G, Dubois E, Nidelet S, Deuve T,  
495 Rasplus J-Y (2014) Empirical assessment of RAD sequencing for interspecific phylogeny.  
496 *Molecular Biology and Evolution*, **31**, 1272-1274.
- 497 DaCosta JM, Sorenson MD (2014) Amplification biases and consistent recovery of loci in a  
498 double-digest RAD-seq protocol. *PLoS One*, **9**, e106713.
- 499 Danecek P, Auton A, Abecasis G, Albers CA, Banks E, DePristo MA, Handsaker RE, Lunter G,  
500 Marth GT, Sherry ST (2011) The variant call format and VCFtools. *Bioinformatics*, **27**,  
501 2156-2158.
- 502 De Queiroz K (2007) Species concepts and species delimitation. *Systematic Biology*, **56**, 879-886.
- 503 Delia JR, Whitney JL, Burkhardt T (2013) Rediscovery of 'lost' treefrogs from the Oaxacan  
504 highlands of Mexico. *Biodiversity and Conservation*, **22**, 1405-1414.
- 505 DePristo MA, Banks E, Poplin R, Garimella KV, Maguire JR, Hartl C, Philippakis AA, Del Angel  
506 G, Rivas MA, Hanna M (2011) A framework for variation discovery and genotyping  
507 using next-generation DNA sequencing data. *Nature Genetics*, **43**, 491-498.

- 508 DeSalle R, Amato G (2004) The expansion of conservation genetics. *Nature Reviews Genetics*, **5**,  
509 702-712.
- 510 DeSalle R, Egan MG, Siddall M (2005) The unholy trinity: taxonomy, species delimitation and  
511 DNA barcoding. *Philosophical Transactions of the Royal Society B: Biological Sciences*, **360**,  
512 1905-1916.
- 513 do Amaral FR, Neves LG, Resende Jr MF, Mobili F, Miyaki CY, Pellegrino KC, Biondo C (2015)  
514 Ultraconserved elements sequencing as a low-cost source of complete mitochondrial  
515 genomes and microsatellite markers in non-model amniotes. *PLoS One*, **10**, e0138446.
- 516 Dowton M, Meiklejohn K, Cameron SL, Wallman J (2014) A preliminary framework for DNA  
517 barcoding, incorporating the multispecies coalescent. *Systematic Biology*, **63**, 639-644.
- 518 Duellman WE (2001) Hylid frogs of Middle America. Society for the Study of Amphibians and  
519 Reptiles, Ithaca, New York.
- 520 Duellman WE, Marion AB, Hedges SB (2016) Phylogenetics, classification, and biogeography of  
521 the treefrogs (Amphibia: Anura: Arboranae). *Zootaxa*, **4104**, 1-109.
- 522 Ebach MC, Holdrege C (2005) DNA barcoding is no substitute for taxonomy. *Nature*, **434**, 697-  
523 697.
- 524 Edgar RC (2004) MUSCLE: multiple sequence alignment with high accuracy and high  
525 throughput. *Nucleic Acids Research*, **32**, 1792-1797.
- 526 Edwards S, Bensch S (2009) Looking forwards or looking backwards in avian phylogeography?  
527 A comment on. *Molecular Ecology*, **18**, 2930-2933.
- 528 Faircloth BC (2015) PHYLUCE is a software package for the analysis of conserved genomic loci.  
529 *Bioinformatics*, **32**, 786-788.
- 530 Faircloth BC, Branstetter MG, White ND, Brady SG (2015) Target enrichment of ultraconserved  
531 elements from arthropods provides a genomic perspective on relationships among  
532 Hymenoptera. *Molecular Ecology Resources*, **15**, 489-501.
- 533 Faircloth BC, Glenn TC (2012) Not all sequence tags are created equal: designing and validating  
534 sequence identification tags robust to indels. *PLoS One*, **7**, e42543.
- 535 Faircloth BC, McCormack JE, Crawford NG, Harvey MG, Brumfield RT, Glenn TC (2012)  
536 Ultraconserved elements anchor thousands of genetic markers spanning multiple  
537 evolutionary timescales. *Systematic Biology*, **61**, 717-726.
- 538 Faircloth BC, Sorenson L, Santini F, Alfaro ME (2013) A phylogenomic perspective on the  
539 radiation of ray-finned fishes based upon targeted sequencing of ultraconserved  
540 elements (UCEs). *PLoS One*, **8**, e65923.
- 541 Faivovich J, Haddad CF, Garcia PC, Frost DR, Campbell JA, Wheeler WC (2009) Systematic  
542 review of the frog family Hylidae, with special reference to Hylinae: phylogenetic



- 543 analysis and taxonomic revision. *Bulletin of the American Museum of Natural History*, **294**,  
544 1-240.
- 545 Fujita MK, Leaché AD, Burbrink FT, McGuire JA, Moritz C (2012) Coalescent-based species  
546 delimitation in an integrative taxonomy. *Trends in Ecology & Evolution*, **27**, 480-488.
- 547 Galtier N, Nabholz B, Glémin S, Hurst G (2009) Mitochondrial DNA as a marker of molecular  
548 diversity: a reappraisal. *Molecular Ecology*, **18**, 4541-4550.
- 549 Grummer JA, Bryson RW, Reeder TW (2014) Species delimitation using Bayes factors:  
550 simulations and application to the *Sceloporus scalaris* species group (Squamata:  
551 Phrynosomatidae). *Systematic Biology*, **63**, 119-133.
- 552 Haas BJ, Papanicolaou A, Yassour M, Grabherr M, Blood PD, Bowden J, Couger MB, Eccles D,  
553 Li B, Lieber M (2013) De novo transcript sequence reconstruction from RNA-seq using  
554 the Trinity platform for reference generation and analysis. *Nature Protocols*, **8**, 1494-1512.
- 555 Hahn C, Bachmann L, Chevreur B (2013) Reconstructing mitochondrial genomes directly from  
556 genomic next-generation sequencing reads—a baiting and iterative mapping approach.  
557 *Nucleic Acids Research*, **41**, e129.
- 558 Harris RS (2007) Improved pairwise alignment of genomic DNA. Pennsylvania State University,  
559 PhD Thesis.
- 560 Hebert PD, Cywinska A, Ball SL (2003) Biological identifications through DNA barcodes.  
561 *Proceedings of the Royal Society of London B: Biological Sciences*, **270**, 313-321.
- 562 Hebert PD, Penton EH, Burns JM, Janzen DH, Hallwachs W (2004) Ten species in one: DNA  
563 barcoding reveals cryptic species in the neotropical skipper butterfly *Astraptes fulgerator*.  
564 *Proceedings of the National Academy of Sciences of the United States of America*, **101**, 14812-  
565 14817.
- 566 Hey J, Waples RS, Arnold ML, Butlin RK, Harrison RG (2003) Understanding and confronting  
567 species uncertainty in biology and conservation. *Trends in Ecology & Evolution*, **18**, 597-  
568 603.
- 569 Hime PM, Hotaling S, Grewelle RE, O'Neill EM, Voss SR, Shaffer HB, Weisrock DW (2016) The  
570 influence of locus number and information content on species delimitation: an empirical  
571 test case in an endangered Mexican salamander. *Molecular Ecology*, **25**, 5959-5974.
- 572 Isaac NJ, Mallet J, Mace GM (2004) Taxonomic inflation: its influence on macroecology and  
573 conservation. *Trends in Ecology & Evolution*, **19**, 464-469.
- 574 Kearse M, Moir R, Wilson A, Stones-Havas S, Cheung M, Sturrock S, Buxton S, Cooper A,  
575 Markowitz S, Duran C (2012) Geneious Basic: an integrated and extendable desktop  
576 software platform for the organization and analysis of sequence data. *Bioinformatics*, **28**,  
577 1647-1649.

- 578 Knowles LL, Carstens BC (2007) Delimiting species without monophyletic gene trees. *Systematic*  
579 *Biology*, **56**, 887-895.
- 580 Lahaye R, Van der Bank M, Bogarin D, Warner J, Pupulin F, Gigot G, Maurin O, Duthoit S,  
581 Barraclough TG, Savolainen V (2008) DNA barcoding the floras of biodiversity hotspots.  
582 *Proceedings of the National Academy of Sciences*, **105**, 2923-2928.
- 583 Leaché AD, Fujita MK, Minin VN, Bouckaert RR (2014) Species delimitation using genome-wide  
584 SNP data. *Systematic Biology*, **63**, 534-542.
- 585 Li H, Durbin R (2009) Fast and accurate short read alignment with Burrows–Wheeler transform.  
586 *Bioinformatics*, **25**, 1754-1760.
- 587 Li H, Handsaker B, Wysoker A, Fennell T, Ruan J, Homer N, Marth G, Abecasis G, Durbin R  
588 (2009) The sequence alignment/map format and SAMtools. *Bioinformatics*, **25**, 2078-2079.
- 589 Lips KR, Mendelson Iii JR, Munoz-Alonso A, Canseco-Márquez L, Mulcahy DG (2004)  
590 Amphibian population declines in montane southern Mexico: resurveys of historical  
591 localities. *Biological Conservation*, **119**, 555-564.
- 592 Mace GM (2004) The role of taxonomy in species conservation. *Philosophical Transactions of the*  
593 *Royal Society of London B: Biological Sciences*, **359**, 711-719.
- 594 McCartney-Melstad E, Mount GG, Shaffer HB (2016) Exon capture optimization in amphibians  
595 with large genomes. *Molecular Ecology Resources*, **16**, 1084-1094.
- 596 McCormack J, Tsai WLE, Faircloth BC (2016) Sequence capture of ultraconserved elements from  
597 bird museum specimens. *Molecular Ecology Resources*, **16**, 1189-1203.
- 598 McCormack JE, Faircloth BC, Crawford NG, Gowaty PA, Brumfield RT, Glenn TC (2012)  
599 Ultraconserved elements are novel phylogenomic markers that resolve placental  
600 mammal phylogeny when combined with species-tree analysis. *Genome Research*, **22**,  
601 746-754.
- 602 McKenna A, Hanna M, Banks E, Sivachenko A, Cibulskis K, Kernytzky A, Garimella K,  
603 Altshuler D, Gabriel S, Daly M (2010) The Genome Analysis Toolkit: a MapReduce  
604 framework for analyzing next-generation DNA sequencing data. *Genome Research*, **20**,  
605 1297-1303.
- 606 Miralles A, Vences M (2013) New metrics for comparison of taxonomies reveal striking  
607 discrepancies among species delimitation methods in *Madascincus* lizards. *PLoS One*, **8**,  
608 e68242.
- 609 Moritz C, Cicero C (2004) DNA barcoding: promise and pitfalls. *PLoS Biology*, **2**, e354.
- 610 O'Meara BC (2009) New heuristic methods for joint species delimitation and species tree  
611 inference. *Systematic Biology*, **59**, 59-73.
- 612 Olmo E (1991) Genome variations in the transition from amphibians to reptiles. *Journal of*  
613 *Molecular Evolution*, **33**, 68-75.



- 614 Pie MR, Bornschein MR, Ribiero LF, Faircloth BC, McCormack JE (2017) Phylogenomic species  
615 delimitation in microendemic frogs Of the Brazilian Atlantic forest. *BioRxiv*, doi:  
616 <https://doi.org/10.1101/143735>.
- 617 Pons J, Barraclough TG, Gomez-Zurita J, Cardoso A, Duran DP, Hazell S, Kamoun S, Sumlin  
618 WD, Vogler AP (2006) Sequence-based species delimitation for the DNA taxonomy of  
619 undescribed insects. *Systematic Biology*, **55**, 595-609.
- 620 Pritchard JK, Stephens M, Donnelly P (2000) Inference of population structure using multilocus  
621 genotype data. *Genetics*, **155**, 945-959.
- 622 Simpson JT, Wong K, Jackman SD, Schein JE, Jones SJ, Birol I (2009) ABySS: a parallel assembler  
623 for short read sequence data. *Genome Research*, **19**, 1117-1123.
- 624 Smith BT, Harvey MG, Faircloth BC, Glenn TC, Brumfield RT (2014) Target capture and  
625 massively parallel sequencing of ultraconserved elements for comparative studies at  
626 shallow evolutionary time scales. *Systematic Biology*, **63**, 83-95.
- 627 Stamatakis A (2014) RAxML version 8: a tool for phylogenetic analysis and post-analysis of  
628 large phylogenies. *Bioinformatics*, **30**, 1312-1313.
- 629 Starrett J, Derkarabetian S, Hedin M, Bryson RW, McCormack JE, Faircloth BC (2016) High  
630 phylogenetic utility of an ultraconserved element probe set designed for Arachnida.  
631 *Molecular Ecology Resources*, DOI: 10.1111/1755-0998.12621.
- 632 Stuart SN, Hoffmann M, Chanson J, Cox N, Berridge R, Ramani P, Young B (2008) Threatened  
633 amphibians of the world. Lynx Edicions, Barcelona, Spain.
- 634 Sukumaran J, Knowles LL (2017) Multispecies coalescent delimits structure, not species.  
635 *Proceedings of the National Academy of Sciences*, **114**, 1607-1612.
- 636 Taberlet P, Coissac E, Pompanon F, Gielly L, Miquel C, Valentini A, Vermet T, Corthier G,  
637 Brochmann C, Willerslev E (2007) Power and limitations of the chloroplast trnL (UAA)  
638 intron for plant DNA barcoding. *Nucleic Acids Research*, **35**, e14-e14.
- 639 Tautz D, Arctander P, Minelli A, Thomas RH, Vogler AP (2003) A plea for DNA taxonomy.  
640 *Trends in Ecology & Evolution*, **18**, 70-74.
- 641 van der Auwera GA, Carneiro MO, Hartl C, Poplin R, del Angel G, Levy-Moonshine A, Jordan  
642 T, Shakir K, Roazen D, Thibault J (2013) From FastQ data to high-confidence variant  
643 calls: the genome analysis toolkit best practices pipeline. *Current Protocols in*  
644 *Bioinformatics*, **11**: 11.10, 11.10. 11-11.10. 33.
- 645 Ward RD, Zemlak TS, Innes BH, Last PR, Hebert PD (2005) DNA barcoding Australia's fish  
646 species. *Philosophical Transactions of the Royal Society of London B: Biological Sciences*, **360**,  
647 1847-1857.

- 648 Wiens JJ (2007) Species delimitation: new approaches for discovering diversity. *Systematic*  
649 *Biology*, **56**, 875-878.
- 650 Will KW, Mishler BD, Wheeler QD (2005) The perils of DNA barcoding and the need for  
651 integrative taxonomy. *Systematic Biology*, **54**, 844-851.
- 652 Witt JD, Threlkoff DL, Hebert PD (2006) DNA barcoding reveals extraordinary cryptic diversity  
653 in an amphipod genus: implications for desert spring conservation. *Molecular Ecology*,  
654 **15**, 3073-3082.
- 655 Yang Z, Rannala B (2010) Bayesian species delimitation using multilocus sequence data.  
656 *Proceedings of the National Academy of Sciences*, **107**, 9264-9269.
- 657 Ye L, Zhu C, Yu D, Zhang Y, Zhang J (2016) The complete mitochondrial genome of *Hyla*  
658 *annectans* (Anura: Hylidae). *Mitochondrial DNA Part A*, **27**, 1593-1594.
- 659 Zarza E, Faircloth BC, Tsai WL, Bryson RW, Klicka J, McCormack JE (2016) Hidden histories of  
660 gene flow in highland birds revealed with genomic markers. *Molecular Ecology*, **25**, 5144-  
661 5157.

662

663

664 **Tables**

665 Table 1. Specimen information and summary statistics for *Sarcohyala bistincta* and closely related  
666 species.

| Map Number <sup>1</sup> | Field Number <sup>2</sup> | Catalog Number <sup>3</sup> | Current Taxonomy    | State     | Latitude | Longitude | Trimmed Paired Reads | UCEs  | Average UCE Length | SNP Read Depth | mtDNA Reads | mtDNA Average Coverage | mtDNA Average Quality |
|-------------------------|---------------------------|-----------------------------|---------------------|-----------|----------|-----------|----------------------|-------|--------------------|----------------|-------------|------------------------|-----------------------|
| 1                       | MK 618                    | UMMZ 239796                 | <i>S. bistincta</i> | MICHOACAN | 19.7911  | -100.6605 | 1,889,670            | 2,323 | 529.7              | 31.8           | 3,381       | 20.8                   | 86                    |
| 2                       | MK 627-31                 | UMMZ 239683                 | <i>S. bistincta</i> | MICHOACAN | 19.4266  | -102.0736 | 1,933,019            | 2,254 | 370.9              | 21.6           | 3,415       | 20.8                   | 85                    |
| 3                       | MK 666                    | UMMZ 239745                 | <i>S. bistincta</i> | MICHOACAN | 19.3452  | -100.3128 | 2,186,871            | 2,350 | 621.3              | 33.9           | 3,900       | 23.4                   | 83                    |
| 4                       | MK 600                    | UMMZ 239679                 | <i>S. bistincta</i> | MEXICO    | 19.1501  | -100.1469 | 932,448              | 2,174 | 500.8              | 24.4           | 2,377       | 15.7                   | 83                    |
| 4                       | MK 600 (1)                | UMMZ 239678                 | <i>S. bistincta</i> | MEXICO    | 19.1501  | -100.1469 | 1,217,987            | 2,267 | 532.8              | 21.9           | 2,570       | 16.4                   | 84                    |
| 5                       | MK 645                    | UMMZ 239749                 | <i>S. bistincta</i> | MORELOS   | 18.9224  | -99.2442  | 2,217,054            | 2,406 | 532.5              | 34.2           | 3,494       | 21.8                   | 86                    |
| 5                       | MK 645 dupl               | UMMZ 239749                 | <i>S. bistincta</i> | MORELOS   | 18.9224  | -99.2442  | 548,545              | 1,964 | 513.0              | 17.7           | 841         | 7.4                    | 60                    |
| 6                       | MK 759                    | UMMZ 239701                 | <i>S. bistincta</i> | GUERRERO  | 18.0013  | -101.1716 | 1,224,835            | 2,199 | 557.6              | 25.0           | 2,522       | 16.2                   | 84                    |
| 6                       | MK 760                    | UMMZ 239705                 | <i>S. bistincta</i> | GUERRERO  | 18.0013  | -101.1716 | 1,074,315            | 2,203 | 559.4              | 24.3           | 743         | 6.9                    | 58                    |
| 6                       | MK 760 (2)                | UMMZ 239704                 | <i>S. bistincta</i> | GUERRERO  | 18.0013  | -101.1716 | 927,774              | 2,246 | 579.2              | 26.3           | 906         | 9.4                    | 6                     |
| 7                       | MK 691 (5)                | UMMZ 239744                 | <i>S. bistincta</i> | GUERRERO  | 17.5324  | -99.8994  | 2,084,203            | 2,353 | 672.5              | 27.2           | 1,678       | 11.9                   | 80                    |
| 8                       | MK 650 (1)                | UMMZ 239725                 | <i>S. bistincta</i> | GUERRERO  | 17.6843  | -99.8034  | 941,101              | 2,124 | 556.6              | 22.6           | 1,278       | 9.7                    | 74                    |
| 8                       | MK 650 (2)                | UMMZ 239701                 | <i>S. bistincta</i> | GUERRERO  | 17.6843  | -99.8034  | 2,224,898            | 2,394 | 506.4              | 28.4           | 1,737       | 12.2                   | 79                    |
| 8                       | MK 652                    | UMMZ 239727                 | <i>S. bistincta</i> | GUERRERO  | 17.6843  | -99.8034  | 3,423,330            | 2,444 | 526.0              | 29.8           | 1,396       | 10.4                   | 74                    |
| 9                       | MK 671 (4)                | UMMZ 239733                 | <i>S. bistincta</i> | GUERRERO  | 17.6407  | -99.6797  | 1,012,300            | 2,107 | 557.0              | 22.5           | 842         | 7.4                    | 62                    |
| 9                       | MK 672                    | UMMZ 239738                 | <i>S. bistincta</i> | GUERRERO  | 17.6407  | -99.6797  | 297,782              | 1,667 | 439.8              | 11.9           | 400         | 5.1                    | 41                    |
| 10                      | MK 656 (1)                | UMMZ 239729                 | <i>S. bistincta</i> | GUERRERO  | 17.5526  | -99.6626  | 580,194              | 1,950 | 497.6              | 18.4           | 547         | 5.9                    | 42                    |
| 11                      | MK 674 (1)                | UMMZ 239690                 | <i>S. bistincta</i> | GUERRERO  | 17.5087  | -99.1258  | 659,418              | 1,941 | 565.4              | 18.8           | 1,086       | 8.7                    | 68                    |
| 11                      | MK 675 (2)                | UMMZ 239879                 | <i>S. bistincta</i> | GUERRERO  | 17.5087  | -99.1258  | 336,474              | 1,565 | 519.1              | 10.4           | 227         | 4.2                    | 24                    |
| 12                      | MK 662                    | UMMZ 239731                 | <i>S. bistincta</i> | GUERRERO  | 18.6359  | -99.6491  | 1,137,742            | 2,130 | 548.7              | 23.5           | 796         | 7.2                    | 56                    |
| 13                      | MK 697 (3)                | UMMZ 239789                 | <i>S. bistincta</i> | VERACRUZ  | 18.6585  | -97.1574  | 1,524,182            | 2,214 | 625.6              | 24.3           | 2,479       | 16.0                   | 82                    |
| 13                      | MK 699 (1)                | UMMZ 239791                 | <i>S. bistincta</i> | VERACRUZ  | 18.6477  | -97.1574  | 1,342,010            | 2,206 | 610.9              | 24.4           | 1,769       | 12.3                   | 79                    |
| 14                      | MK 700 (2)                | UMMZ 239750                 | <i>S. bistincta</i> | PUEBLA    | 18.3220  | -97.0285  | 2,203,360            | 2,298 | 697.8              | 27.6           | 4,155       | 24.8                   | 86                    |
| 15                      | MK 705 (1)                | UMMZ 239862                 | <i>S. bistincta</i> | OAXACA    | 18.1576  | -96.8684  | 2,529,703            | 2,417 | 644.6              | 30.3           | 3,164       | 19.6                   | 85                    |
| 16                      | MK 715                    | UMMZ 239755                 | <i>S. bistincta</i> | OAXACA    | 17.2390  | -97.0032  | 347,152              | 1,712 | 437.7              | 12.1           | 254         | 4.3                    | 31                    |
| 17                      | MK 716 (1)                | UMMZ 239758                 | <i>S. bistincta</i> | OAXACA    | 17.3036  | -96.7930  | 52,461               | 594   | 267.4              | 2.7            | 8           | 3.0                    | 1                     |
| 18                      | MK 718 (2)                | UMMZ 239765                 | <i>S. bistincta</i> | OAXACA    | 17.4211  | -96.6876  | 606,978              | 2,014 | 568.6              | 19.7           | 366         | 4.9                    | 37                    |
| 19                      | MK 755 (1)                | UMMZ 239786                 | <i>S. bistincta</i> | OAXACA    | 17.4153  | -96.5671  | 871,034              | 2,062 | 563.2              | 22.0           | 1,022       | 8.4                    | 69                    |
| 20                      | MK 751                    | UMMZ 239785                 | <i>S. bistincta</i> | OAXACA    | 17.3160  | -96.4435  | 1,577,190            | 2,342 | 621.5              | 28.5           | 2,376       | 15.4                   | 84                    |
| 22                      | MK 748 (2)                | UMMZ 239780                 | <i>S. bistincta</i> | OAXACA    | 16.9791  | -96.1364  | 91,912               | 1,009 | 302.5              | 4.2            | 23          | 3.1                    | 3                     |
| 22                      | MK 748 (4)                | UMMZ 239782                 | <i>S. bistincta</i> | OAXACA    | 16.9791  | -96.1364  | 1,058,426            | 2,170 | 553.8              | 23.7           | 499         | 5.7                    | 42                    |
| 22                      | MK 767                    | UMMZ 239788                 | <i>S. bistincta</i> | OAXACA    | 16.9859  | -96.1358  | 1,083,058            | 2,206 | 524.7              | 24.3           | 617         | 6.3                    | 52                    |
| 23                      | MK 721                    | UMMZ 239767                 | <i>S. bistincta</i> | OAXACA    | 16.7377  | -97.0384  | 146,471              | 1,215 | 376.0              | 6.1            | 62          | 3.3                    | 10                    |
| 24                      | MK 766                    | UMMZ 239794                 | <i>S. bistincta</i> | OAXACA    | 16.2522  | -97.1536  | 994,521              | 2,166 | 577.4              | 23.3           | 467         | 5.5                    | 43                    |
| 25                      | MK 730 (2)                |                             | <i>P. bistincta</i> | OAXACA    | 16.0186  | -96.5301  | 2,967,630            | 2,404 | 716.9              | 31.1           | 3,581       | 21.7                   | 84                    |
| 26                      | MK 685 (2)                | UMMZ 239739                 | <i>S. sp. nov.</i>  | GUERRERO  | 17.3812  | -100.2009 | 269,729              | 1,645 | 450.6              | 10.8           | 184         | 4.0                    | 20                    |
| 27                      | MK 689 (2)                | UMMZ 239740                 | <i>S. sp. nov.</i>  | GUERRERO  | 17.3000  | -100.2792 | 67,313               | 502   | 221.6              | 2.6            | 32          | 3.1                    | 6                     |
| 28                      | MK 727 (2)                | UMMZ 239772                 | <i>S. pentheter</i> | OAXACA    | 16.1916  | -97.0958  | 17,052               | 381   | 247.1              | 2.4            | 10          | 3.0                    | 2                     |
| 29                      | MK 691 (3)                | UMMZ 239651                 | <i>S. chryses</i>   | GUERRERO  | 17.5324  | -99.8994  | 2,267,946            | 2,347 | 663.6              | 35.0           | 4,919       | 33.4                   | 83                    |
| 30                      | MK 770                    | UMMZ 239802                 | <i>S. hazelae</i>   | OAXACA    | 17.2216  | -96.5839  | 538,500              | 2,066 | 526.2              | 19.8           | 557         | 5.9                    | 44                    |

<sup>1</sup> Map number in Figure 1

<sup>2</sup> The first three-digit number corresponds to a sampling location. If there is a second number in parentheses, this corresponds to different aquaria where tadpoles were sorted by species before

<sup>3</sup> All specimens are from the University of Michigan Museum of Zoology

667

668 Table 2. Bayes factor species delimitation results.

| Model | Species | MLE      | Rank | $\ln(\text{BF})$ |
|-------|---------|----------|------|------------------|
| runA  | 9       | -2832.33 | 1    | 10.52            |
| runB  | 10      | -2837.59 | 2    | 132.52           |
| runC  | 7       | -2903.85 | 3    | 69.36            |
| runD  | 6       | -2938.53 | 4    | 3822             |
| runE  | 2       | -4849.53 | 5    | -                |

669

670

671 **Figures**

672 Figure 1. (A) Map of central Mexico showing sampling sites for *S. bistincta* and close outgroups,  
 673 with numbers matching localities listed in Table 1 and colors matching Structure results below.  
 674 Unsampled parts of the distribution of *S. bistincta* are shown in Fig. S1; (B) *S. bistincta* individual  
 675 from near site 1; (C) Composite results of repeated Structure runs at  $K = 2$  showing the finest  
 676 detectable structure in the genetic data. Each vertical line represents an individual labeled with  
 677 its UMMZ catalog number above and, in descending order below, the site number and the  
 678 lineages indicated by the species delimitation analysis.

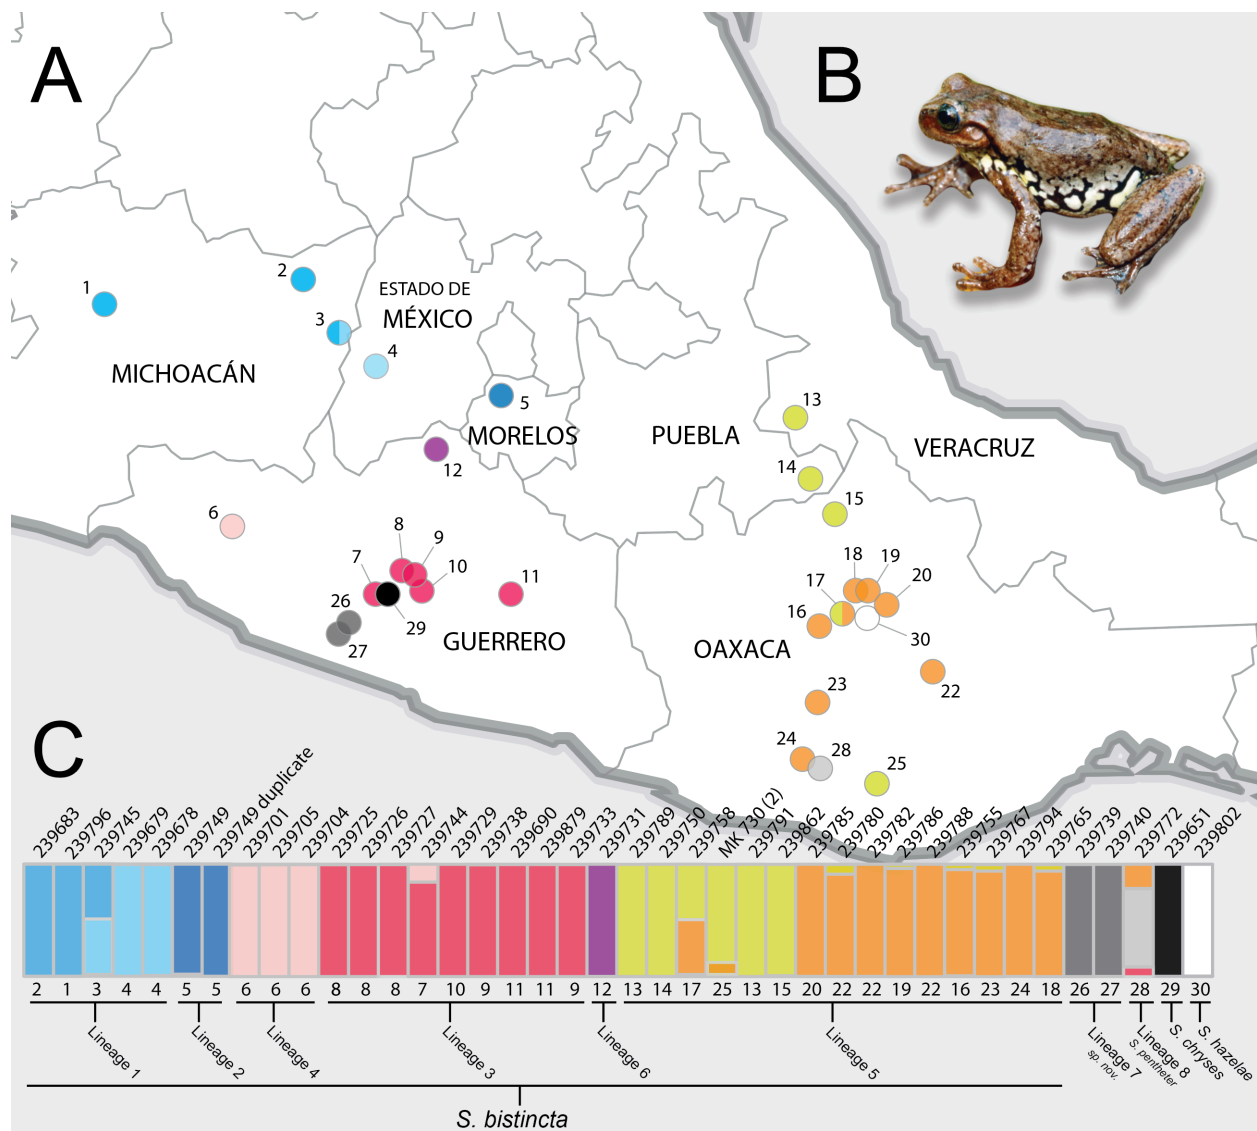

679

680 Figure 2. (A) UCE tree; (B) mtDNA tree. Colors match Structure groups identified in Fig. 1. Tips  
681 are labeled with their UMMZ catalog number.

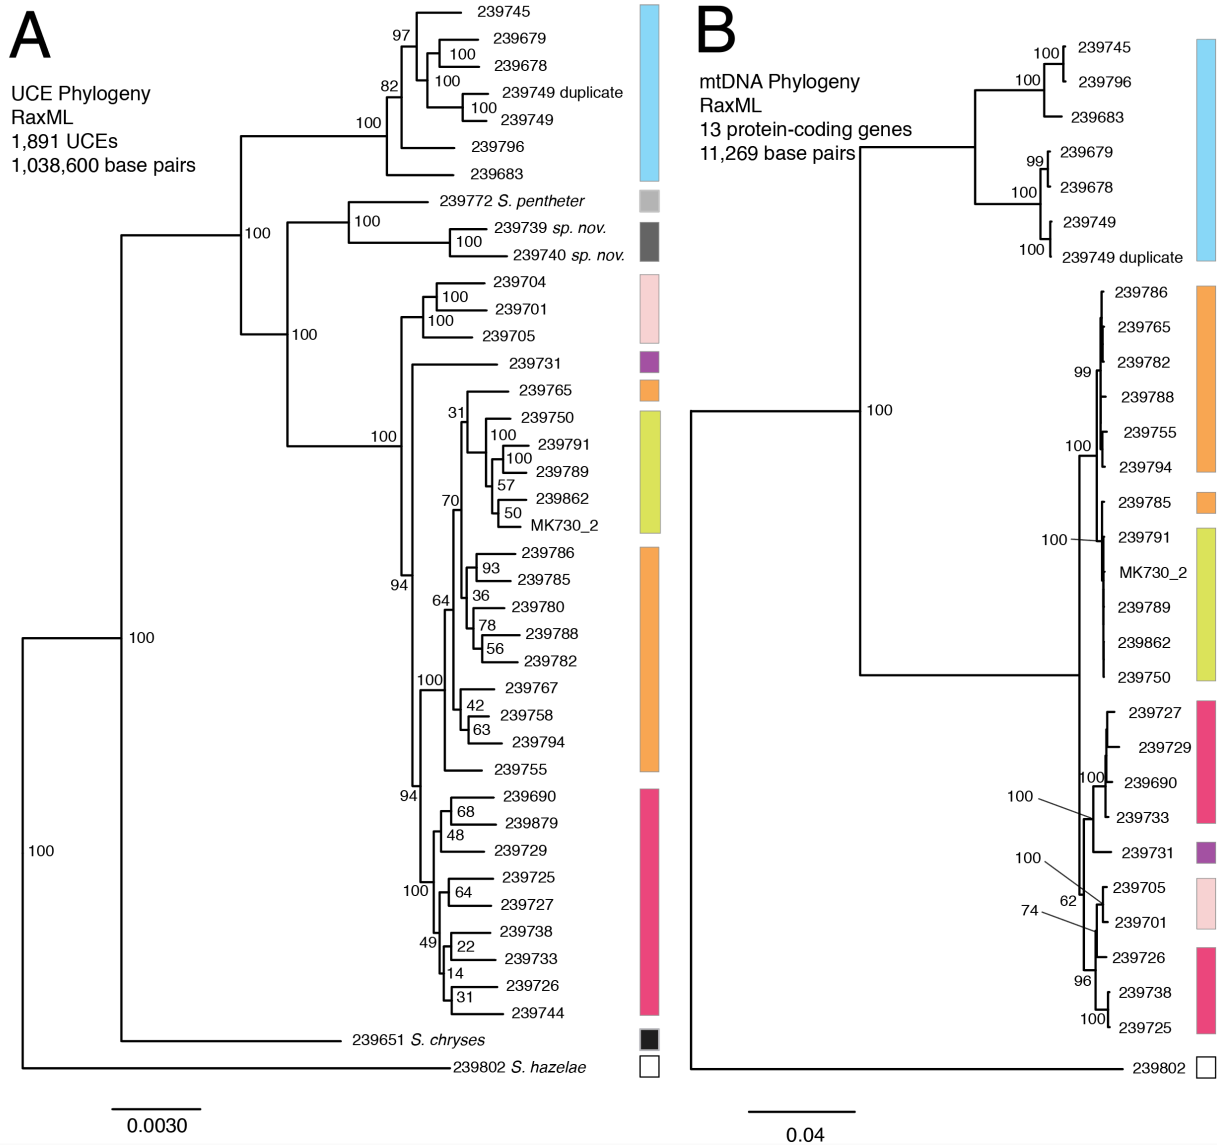

682

683 Figure 3. Cloudogram of the posterior distribution of SNAPP trees from 399 high-quality SNPs  
684 mined from UCE loci. Tip labels are UMMZ catalog numbers. Colored bars show the eight  
685 lineages identified by the species delimitation analysis in addition to the outgroup *S. chryses*.  
686 Clades are discussed in text. Colors match genetic clusters from Figure 1.

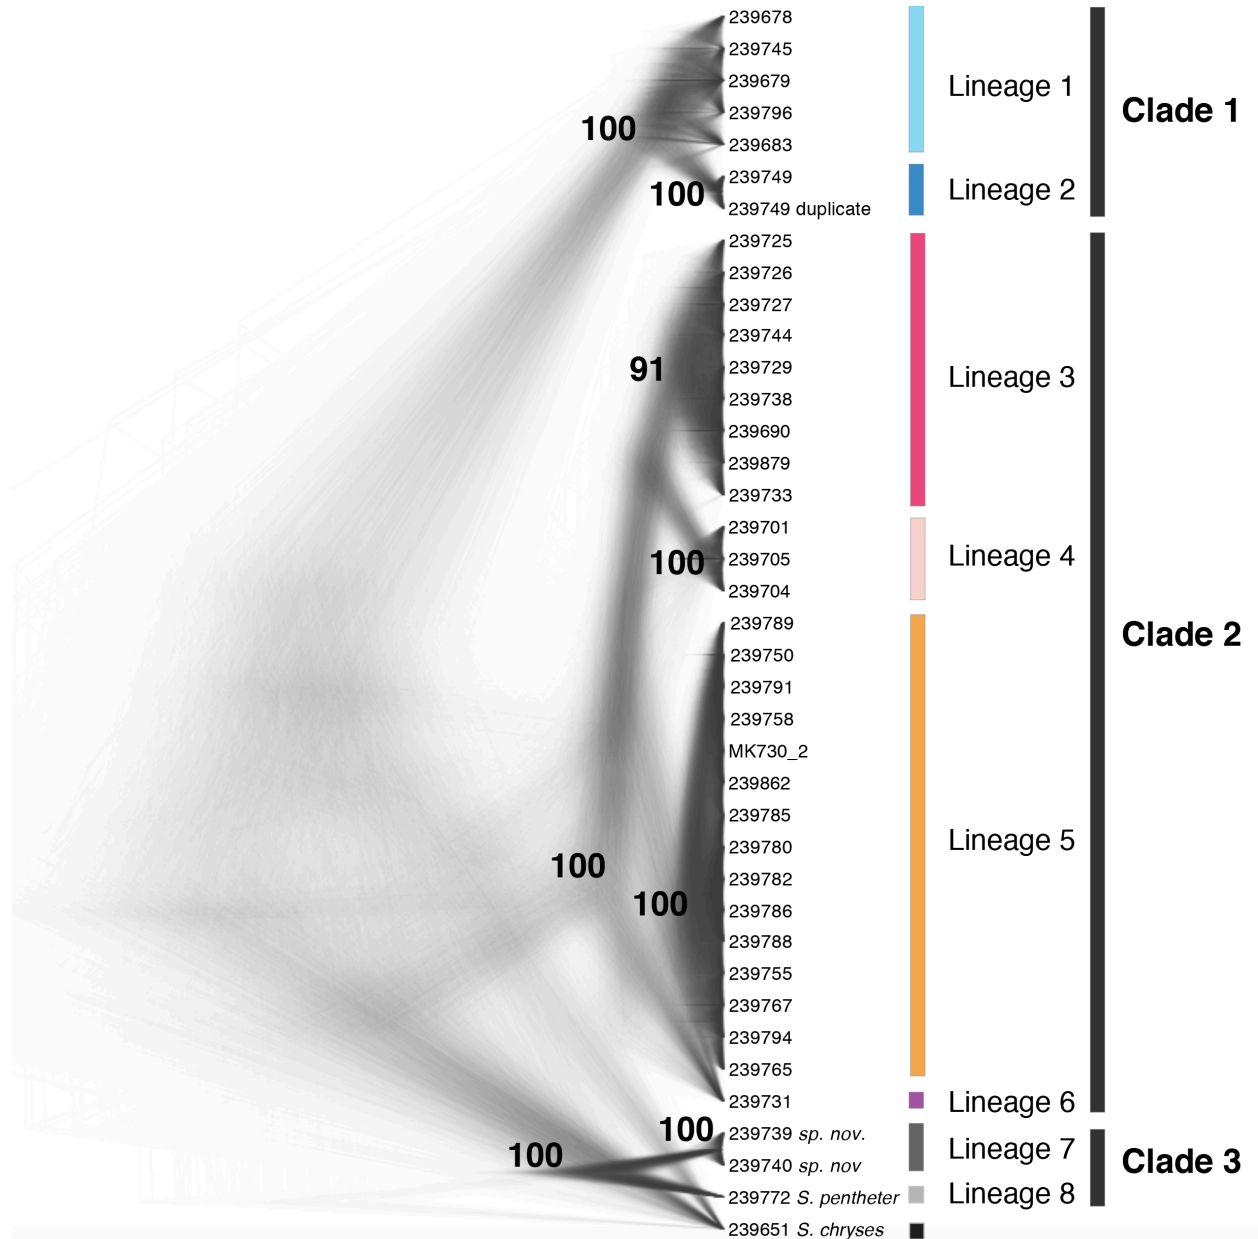

687





694 Table S1. Information and summary statistics on all 45 samples used to determine the ingroup  
 695 for this study.

| Field Number | UMMZ Number | Current Taxonomy                 | State     | Locality                                                                                                                                                           | Latitude  | Longitude   | Trimmed Paired Reads | UCEs | Average UCE length | mtDNA reads | mtDNA average coverage | mtDNA average quality | Fig. 1 Map Number | Accession number |
|--------------|-------------|----------------------------------|-----------|--------------------------------------------------------------------------------------------------------------------------------------------------------------------|-----------|-------------|----------------------|------|--------------------|-------------|------------------------|-----------------------|-------------------|------------------|
| MK 618       | UMMZ 239796 | <i>Sarcophya bistrincta</i>      | MICHOACAN | LOS AZUFRES / SAN PEDRO ROAD                                                                                                                                       | 19.791051 | -100.660542 | 1,889,670            | 2323 | 529.7              | 3381        | 20.8                   | 86                    | 1                 |                  |
| MK 627-31    | UMMZ 239683 | <i>Sarcophya bistrincta</i>      | MICHOACAN | PARQUE BARRANCA DEL CUPATITZIO URUAPAN                                                                                                                             | 19.426646 | -102.073574 | 1,933,019            | 2254 | 370.9              | 3415        | 20.8                   | 85                    | 2                 |                  |
| MK 666       | UMMZ 239745 | <i>Sarcophya bistrincta</i>      | MICHOACAN | 13 KMS ROAD ZITACUARO MACHERO (LITTLE TOWN WHERE THERE IS A MONARCH BUTTERFLY SANCTUARY)                                                                           | 19.3452   | -100.3128   | 2,186,871            | 2350 | 621.3              | 3900        | 23.4                   | 83                    | 3                 |                  |
| MK 600       | UMMZ 239679 | <i>Sarcophya bistrincta</i>      | MEXICO    | CARRETERA VALLE DE BRAVO-SAN PEDRO TENEYAC ARROYO 1 (6860 FEET) (POR ALBARRADA)                                                                                    | 19.150083 | -100.1469   | 932,448              | 2174 | 500.8              | 2377        | 15.7                   | 83                    | 4                 |                  |
| MK 600 (1)   | UMMZ 239678 | <i>Sarcophya bistrincta</i>      | MEXICO    | BOSQUE BIEN CONSERVADO Y HUMEDO<br>CARRETERA VALLE DE BRAVO-SAN PEDRO TENEYAC ARROYO 1 (6860 FEET) (POR ALBARRADA)                                                 | 19.150083 | -100.1469   | 1,217,987            | 2267 | 532.8              | 2570        | 16.4                   | 84                    | 4                 |                  |
| MK 645       | UMMZ 239749 | <i>Sarcophya bistrincta</i>      | MORELOS   | 2 KMS OUT OF CUERNAVACA ON THE CUERNAVACA CHALMA RD. (PASSING CONJUNTO CERRADO) OF LA BARRANCA WHERE THE SALTO SAN ANTONIO IS                                      | 18.922402 | -99.244151  | 2,217,054            | 2406 | 532.5              | 3494        | 21.8                   | 86                    | 5                 |                  |
| MK 645 dupe  | UMMZ 239749 | <i>Sarcophya bistrincta</i>      | MORELOS   | 2 KMS OUT OF CUERNAVACA ON THE CUERNAVACA CHALMA RD. (PASSING CONJUNTO CERRADO) OF LA BARRANCA WHERE THE SALTO SAN ANTONIO IS                                      | 18.922402 | -99.244151  | 548,585              | 1964 | 513.0              | 841         | 7.4                    | 60                    | 5                 |                  |
| MK 759       | UMMZ 239701 | <i>Sarcophya bistrincta</i>      | MORELOS   | CA 100 DEG KMS FROM CIUDAD ALTAMIRANO VIA XTAPA ZIHUATANEJO                                                                                                        | 18.0013   | -101.1716   | 1,224,835            | 2199 | 557.6              | 2522        | 16.2                   | 84                    | 6                 |                  |
| MK 760       | UMMZ 239705 | <i>Sarcophya bistrincta</i>      | GUERRERO  | CA 100 DEG KMS FROM CIUDAD ALTAMIRANO VIA XTAPA ZIHUATANEJO                                                                                                        | 18.0013   | -101.1716   | 1,074,315            | 2203 | 559.4              | 743         | 6.9                    | 58                    | 6                 |                  |
| MK 760 (2)   | UMMZ 239704 | <i>Sarcophya bistrincta</i>      | GUERRERO  | CA 100 DEG KMS FROM CIUDAD ALTAMIRANO VIA XTAPA ZIHUATANEJO                                                                                                        | 18.0013   | -101.1716   | 927,774              | 2246 | 579.2              | 906         | 9.4                    | 6                     | 6                 |                  |
| MK 691 (5)   | UMMZ 239744 | <i>Sarcophya bistrincta</i>      | GUERRERO  | 2-3 KMS IN THE ROAD TO JALEACA FROM POINT WHERE ROAD TRIFURCATE TO PTO. DEL GALLO / YEXTLA / ANDJALEACA.COMMING FROM CARRIZAL DE BRAVO / IN RIVER UNDER THE BRIDGE | 17.5324   | -99.8994    | 2,084,203            | 2353 | 672.5              | 1678        | 11.9                   | 80                    | 7                 |                  |
| MK 650 (1)   | UMMZ 239725 | <i>Sarcophya bistrincta</i>      | GUERRERO  | MOUNTAINS W. OF CHILPANCINGO / TOWN LOS MORROS                                                                                                                     | 17.6843   | -99.80339   | 941,101              | 2124 | 556.6              | 1278        | 9.7                    | 74                    | 8                 |                  |
| MK 650 (2)   | UMMZ 239726 | <i>Sarcophya bistrincta</i>      | GUERRERO  | MOUNTAINS W. OF CHILPANCINGO / TOWN LOS MORROS                                                                                                                     | 17.6843   | -99.80339   | 2,224,898            | 2394 | 506.4              | 1737        | 12.2                   | 79                    | 8                 |                  |
| MK 652       | UMMZ 239727 | <i>Sarcophya bistrincta</i>      | GUERRERO  | MOUNTAINS W. OF CHILPANCINGO / TOWN LOS MORROS                                                                                                                     | 17.6843   | -99.80339   | 3,423,330            | 2444 | 526.0              | 1396        | 10.4                   | 74                    | 8                 |                  |
| MK 671 (4)   | UMMZ 239733 | <i>Sarcophya bistrincta</i>      | GUERRERO  | BEHIND CHICHIHUALCO / ON ROAD TO CARRIZAL DE BRAVO / 2 KMS FROM ENTRONQUE                                                                                          | 17.6407   | -99.6797    | 1,012,300            | 2107 | 557.0              | 842         | 7.4                    | 62                    | 9                 |                  |
| MK 672       | UMMZ 239738 | <i>Sarcophya bistrincta</i>      | GUERRERO  | BEHIND CHICHIHUALCO / ON ROAD TO CARRIZAL DE BRAVO / 2 KMS FROM ENTRONQUE                                                                                          | 17.6407   | -99.6797    | 297,782              | 1667 | 439.8              | 400         | 5.1                    | 41                    | 9                 |                  |
| MK 656 (1)   | UMMZ 239729 | <i>Sarcophya bistrincta</i>      | GUERRERO  | 3 KMS FROM THE TOWN OF OMILETEMI IN THE ROAD OMILETEMI CHILPANCINGO                                                                                                | 17.552603 | -99.662569  | 580,194              | 1950 | 497.6              | 547         | 5.9                    | 42                    | 10                |                  |
| MK 674 (1)   | UMMZ 239690 | <i>Sarcophya bistrincta</i>      | GUERRERO  | ON ATZACUALOYA HUEYCATENANGO RD.                                                                                                                                   | 17.5087   | -99.1258    | 659,418              | 1941 | 565.4              | 1086        | 8.7                    | 68                    | 11                |                  |
| MK 675 (2)   | UMMZ 239879 | <i>Sarcophya bistrincta</i>      | GUERRERO  | ON ATZACUALOYA HUEYCATENANGO RD.                                                                                                                                   | 17.5087   | -99.1258    | 336,474              | 1565 | 519.1              | 227         | 4.2                    | 24                    | 11                |                  |
| MK 662       | UMMZ 239731 | <i>Sarcophya bistrincta</i>      | GUERRERO  | 1.6 KMS FROM THE TOWN OF TETIPAC ON THE TETIPAC TAXCO ROAD (MAYBE ARROYO LAS DAMAS)                                                                                | 18.635895 | -99.6491    | 1,137,742            | 2130 | 548.7              | 796         | 7.2                    | 56                    | 12                |                  |
| MK 697 (3)   | UMMZ 239789 | <i>Sarcophya bistrincta</i>      | VERACRUZ  | ON ATZOMPAXOXOCOTLA RD. 1.5 KMS FROM XOXOCOTLA                                                                                                                     | 18.6585   | -97.1574    | 1,524,182            | 2214 | 625.6              | 2479        | 16.0                   | 82                    | 13                |                  |
| MK 699 (1)   | UMMZ 239791 | <i>Sarcophya bistrincta</i>      | VERACRUZ  | ON STREAM CROSSING THE TOWN OF XOXOCOTLA                                                                                                                           | 18.6477   | -97.1574    | 1,342,010            | 2206 | 610.9              | 1769        | 12.3                   | 79                    | 13                |                  |
| MK 700 (2)   | UMMZ 239750 | <i>Sarcophya bistrincta</i>      | PUEBLA    | IN THE STREAM LOCATED AFTER THE TOWN OF ZOQUILLAN TURNING DOWN AT THE CENTRO DE SALUD                                                                              | 18.322    | -97.0285    | 2,203,360            | 2298 | 697.8              | 4155        | 24.8                   | 86                    | 14                |                  |
| MK 705 (1)   | UMMZ 239862 | <i>Sarcophya bistrincta</i>      | OAXACA    | 56 KMS FROM TEOTITLAN VIA HUAUTLA                                                                                                                                  | 18.1576   | -96.8684    | 2,529,703            | 2417 | 644.6              | 3164        | 19.6                   | 85                    | 15                |                  |
| MK 715       | UMMZ 239755 | <i>Sarcophya bistrincta</i>      | OAXACA    | NEAR "EL TEJOCOTE" (FRENTE AL KINDER)                                                                                                                              | 17.239    | -97.0032    | 347,152              | 1712 | 437.7              | 254         | 4.3                    | 31                    | 16                |                  |
| MK 716 (1)   | UMMZ 239758 | <i>Sarcophya bistrincta</i>      | OAXACA    | ON ROAD BETWEEN THE TOWNS OF SAN JUAN DEL ESTADO AND SAN MIGUEL ALOAPAN                                                                                            | 17.3036   | -96.793     | 52,461               | 594  | 267.4              | 8           | 3.0                    | 1                     | 17                |                  |
| MK 718 (2)   | UMMZ 239765 | <i>Sarcophya bistrincta</i>      | OAXACA    | PASSING SAN MIGUEL ALOAPAN                                                                                                                                         | 17.4211   | -96.6876    | 606,978              | 2014 | 568.6              | 366         | 4.9                    | 37                    | 18                |                  |
| MK 755 (1)   | UMMZ 239786 | <i>Sarcophya bistrincta</i>      | OAXACA    | ON ROAD SAN JUAN ATEPEC SAN MIGUEL ABEJONES                                                                                                                        | 17.4153   | -96.5671    | 871,034              | 2062 | 563.2              | 1022        | 8.4                    | 69                    | 19                |                  |
| MK 751       | UMMZ 239785 | <i>Sarcophya bistrincta</i>      | OAXACA    | 3.8 KMS PASSING "RANCHO TEXAS" ON THE ROAD FROM THE TOWN OF IXTLAN DE JUAREZ                                                                                       | 17.316    | -96.4435    | 1,577,190            | 2342 | 621.5              | 2376        | 15.4                   | 84                    | 20                |                  |
| MK 748 (2)   | UMMZ 239780 | <i>Sarcophya bistrincta</i>      | OAXACA    | CA 37 KMS FROM MITLA ON THE ROAD MITLA AYUTLA                                                                                                                      | 16.9791   | -96.1364    | 91,912               | 1009 | 302.5              | 23          | 3.1                    | 3                     | 22                |                  |
| MK 748 (4)   | UMMZ 239782 | <i>Sarcophya bistrincta</i>      | OAXACA    | CA 37 KMS FROM MITLA ON THE ROAD MITLA AYUTLA                                                                                                                      | 16.9791   | -96.1364    | 1,058,426            | 2170 | 553.8              | 499         | 5.7                    | 42                    | 22                |                  |
| MK 767       | UMMZ 239788 | <i>Sarcophya bistrincta</i>      | OAXACA    | 9.2 KMS E STA MARIA ALBARRADAS / SIERRA MIXE                                                                                                                       | 16.985888 | -96.135816  | 1,083,058            | 2206 | 524.7              | 617         | 6.3                    | 52                    | 22                |                  |
| MK 721       | UMMZ 239767 | <i>Sarcophya bistrincta</i>      | OAXACA    | 2 KMS N. THE TOWN OF STA. MARIA LAXICHIO VIA THE TOWN OF SAN SEBASTIAN RIO DULCE                                                                                   | 16.7377   | -97.0384    | 146,471              | 1215 | 376.0              | 62          | 3.3                    | 10                    | 23                |                  |
| MK 766       | UMMZ 239794 | <i>Sarcophya bistrincta</i>      | OAXACA    | CERRO DE VIDRIO VIA A PUERTO ESCONDIDO                                                                                                                             | 16.25216  | -97.15359   | 994,521              | 2166 | 577.4              | 467         | 5.5                    | 43                    | 24                |                  |
| MK 730 (2)   |             | <i>Sarcophya bistrincta</i>      | OAXACA    | SLIGHTLY NORTH OF THE TOWN JALATENGO ON HWY 175                                                                                                                    | 16.0186   | -96.5301    | 2,967,630            | 2404 | 716.9              | 3581        | 21.7                   | 84                    | 25                |                  |
| MK 685 (2)   | UMMZ 239739 | <i>Sarcophya sp. nov.</i>        | GUERRERO  | ON ATOYAC PTO DE GALLO RD / BETWEEN 10 - 20 KMS NORTH OF THE TOWN "EL PARAISO"                                                                                     | 17.3812   | -100.2009   | 269,729              | 1645 | 450.6              | 184         | 4.0                    | 20                    | 26                |                  |
| MK 689 (2)   | UMMZ 239740 | <i>Sarcophya sp. nov.</i>        | GUERRERO  | ON ATOYAC PTO DEL GALLO RD. / 500 M. NORTH OF THE TOWN OF SAN VICENTE                                                                                              | 17.3      | -100.2792   | 67,313               | 502  | 221.6              | 32          | 3.1                    | 6                     | 27                |                  |
| MK 727 (2)   | UMMZ 239772 | <i>Sarcophya penheter</i>        | OAXACA    | RIO "EL SALADO" / 8 KMS N SAN JUAN LACHAO ON HWY 135                                                                                                               | 16.1916   | -97.0958    | 17,052               | 381  | 247.1              | 10          | 3.0                    | 2                     | 28                |                  |
| MK 691 (3)   | UMMZ 239651 | <i>Plectrohyla chryseae</i>      | GUERRERO  | 2-3 KMS IN THE ROAD TO JALEACA FROM POINT WHERE ROAD TRIFURCATE TO PTO. DEL GALLO / YEXTLA / ANDJALEACA.COMMING FROM CARRIZAL DE BRAVO / IN RIVER UNDER THE BRIDGE | 17.5324   | -99.8994    | 2,267,946            | 2347 | 663.6              | 4919        | 33.4                   | 83                    | 29                |                  |
| MK 770       | UMMZ 239802 | <i>Plectrohyla hazelae</i>       | OAXACA    | EL PUNTO SIERRA JUAREZ                                                                                                                                             | 17.22156  | -96.58386   | 538,500              | 2066 | 526.2              | 557         | 5.9                    | 44                    | 30                |                  |
| MK 667       | UMMZ 239952 | <i>Sarcophyla arborescendens</i> | VERACRUZ  | PUERTO DEL AIRE (ARRIBA DE ALCUTZINGO)                                                                                                                             | 18.6787   | -97.3485    | 923,330              | 2116 | 511.8              | 1154        | 9.0                    | 69                    |                   |                  |
| MK 700 (1)   | UMMZ 239813 | <i>Sarcophyla cyclada</i>        | PUEBLA    | IN THE STREAM LOCATED AFTER THE TOWN OF ZOQUILLAN TURNING DOWN AT THE CENTRO DE SALUD                                                                              | 18.322    | -97.0285    | 2,490,616            | 2385 | 661.4              | 2961        | 18.4                   | 82                    |                   |                  |
| MK 701       | UMMZ 239814 | <i>Sarcophyla cyclada</i>        | OAXACA    | 24 KMS FROM THE TOWN OF TEOTITLAN DE FLORES MAGON VIA HUAUTLA DE JIMENEZ                                                                                           | 18.1781   | -97.0054    | 1,166,574            | 2129 | 565.5              | 1061        | 8.7                    | 69                    |                   |                  |
| MK 742 (1)   | UMMZ 239954 | <i>Sarcophyla arborescendens</i> | VERACRUZ  | LEFT ROAD BIFURCATING FROM ROAD TO THE TOWN OF "LAS MINAS"                                                                                                         | 19.6758   | -97.1751    | 1,074,225            | 2240 | 553.8              | 1750        | 12.0                   | 79                    |                   |                  |
| MK 768       | UMMZ 239833 | <i>Ezerodonta xera</i>           | PUEBLA    | 5 KM SW ZAPOTITLAN DE SALINAS                                                                                                                                      | 18.311958 | -97.51266   | 1,257,938            | 2288 | 581.5              | 3506        | 21.4                   | 84                    |                   |                  |

696



697 Fig. S1. Sampled and unsampled parts of *S. bistrincta* range in relation to known distributions (or  
 698 localities, where distributional information is lacking) of other *Sarcohyala* species.

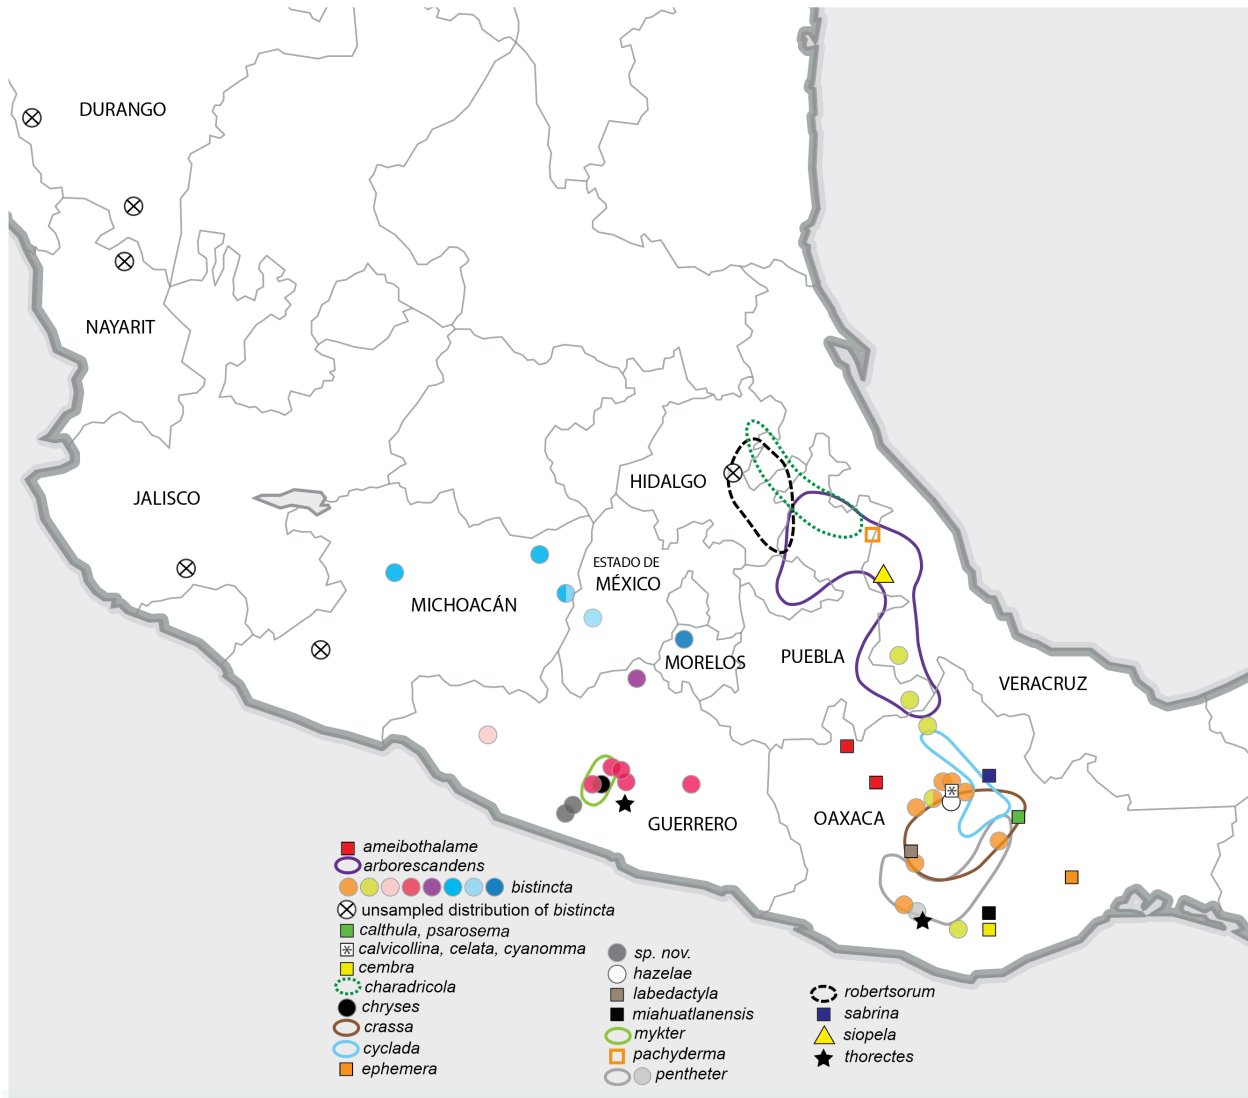

700 Fig. S2. UCE tree of 45 samples of *Sarcohylla* and outgroup *Exerodonta xera* used to determine the  
701 ingroup.

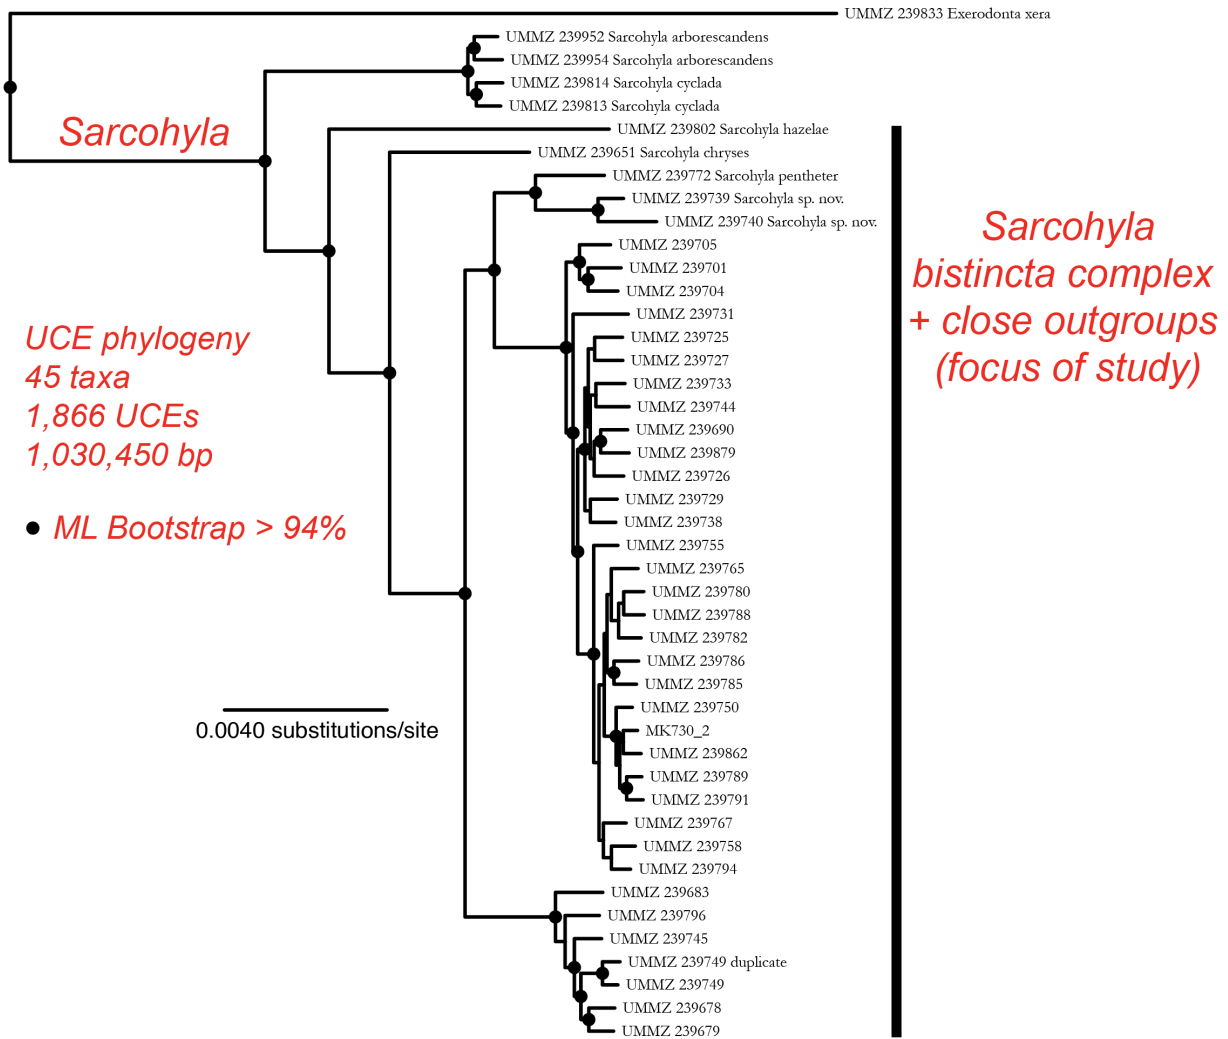

702
